# Supplementary material for: Conceptual Mapping of Health-Related Quality of Life, Quality of Life, and Wellbeing: A Systematic Review and Assessment of Commonly Used Patient-Reported Outcomes Measures
Source: Research Square preprint supplement (doi:10.21203/rs.3.rs-6976096/v1), 2025-07-07

DeVries:
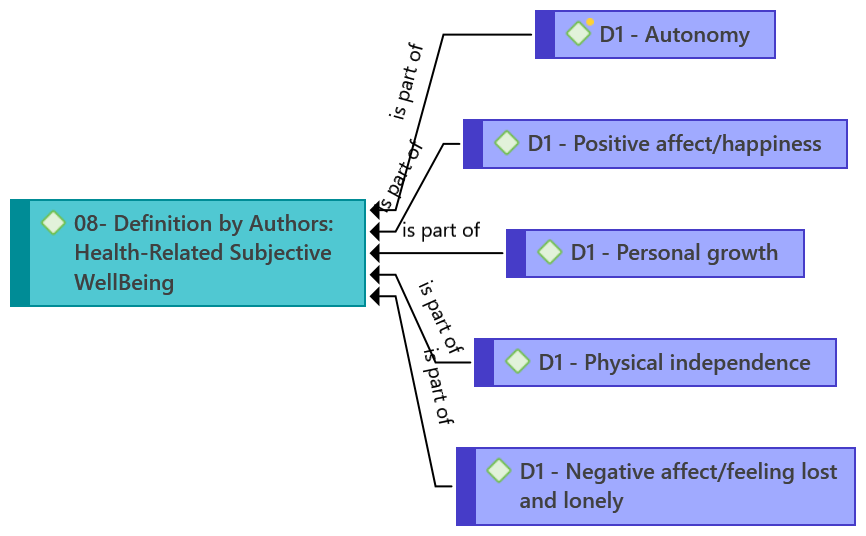


Dolan
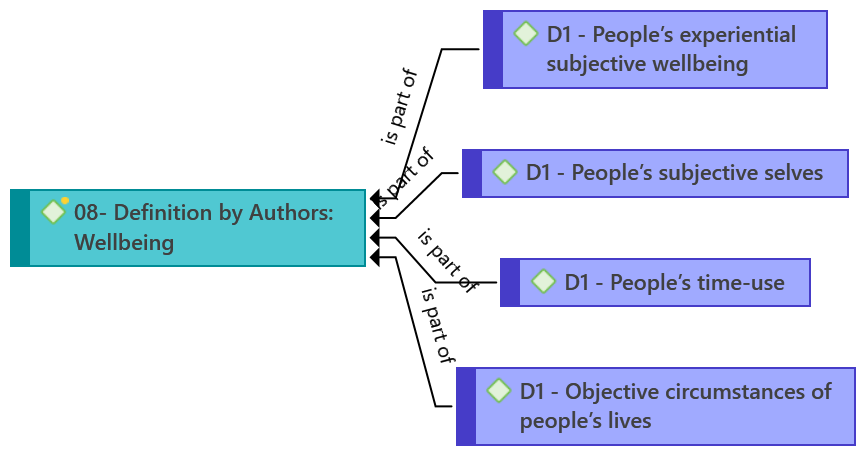
 Hupper
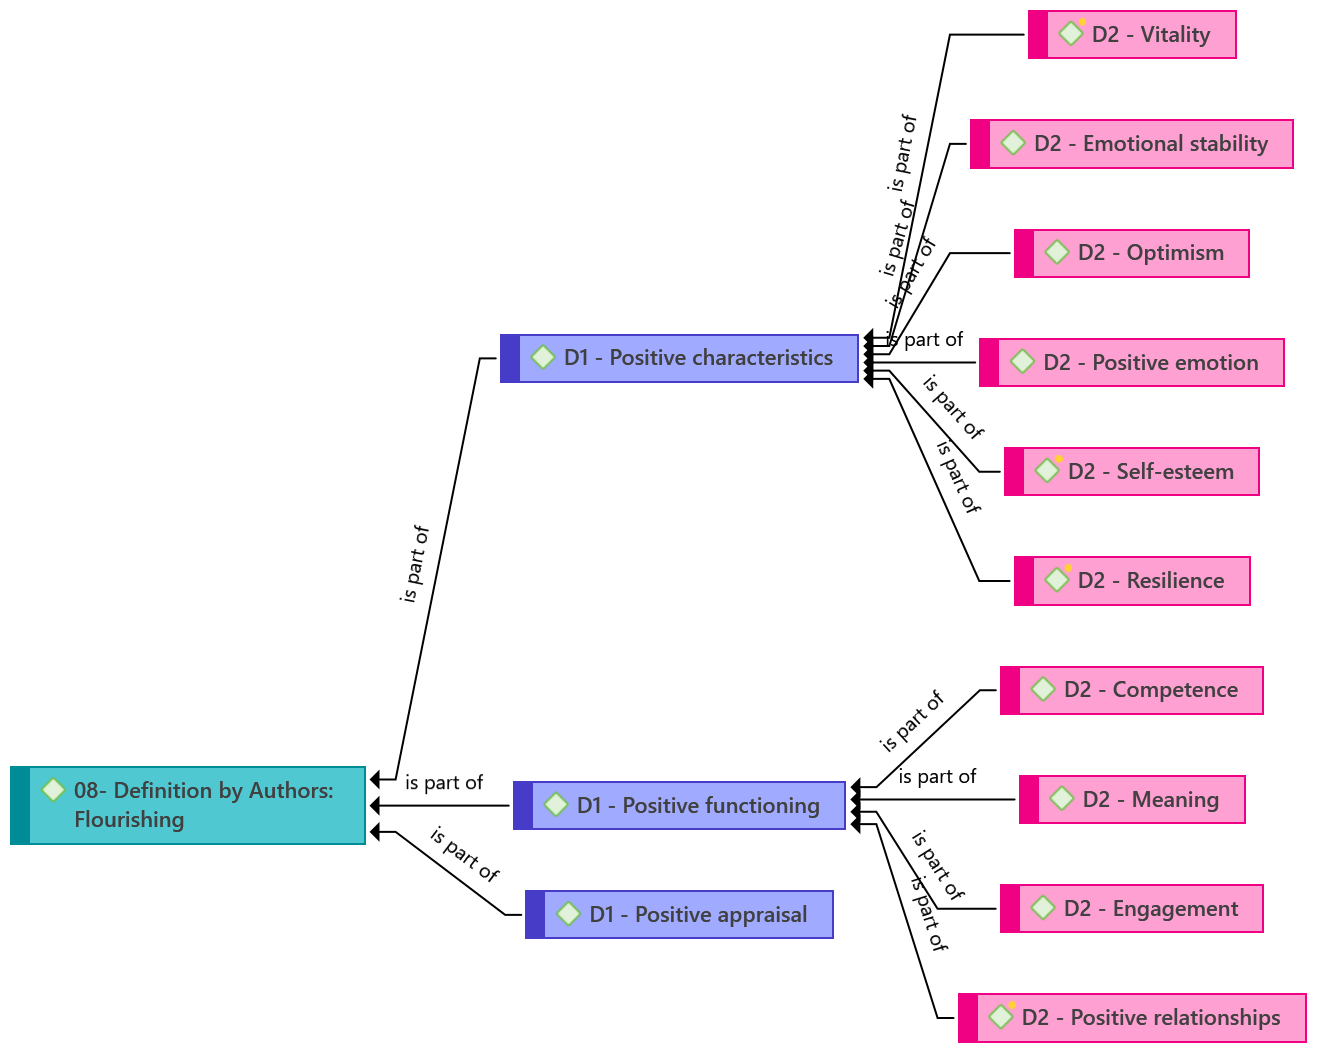
 Kim


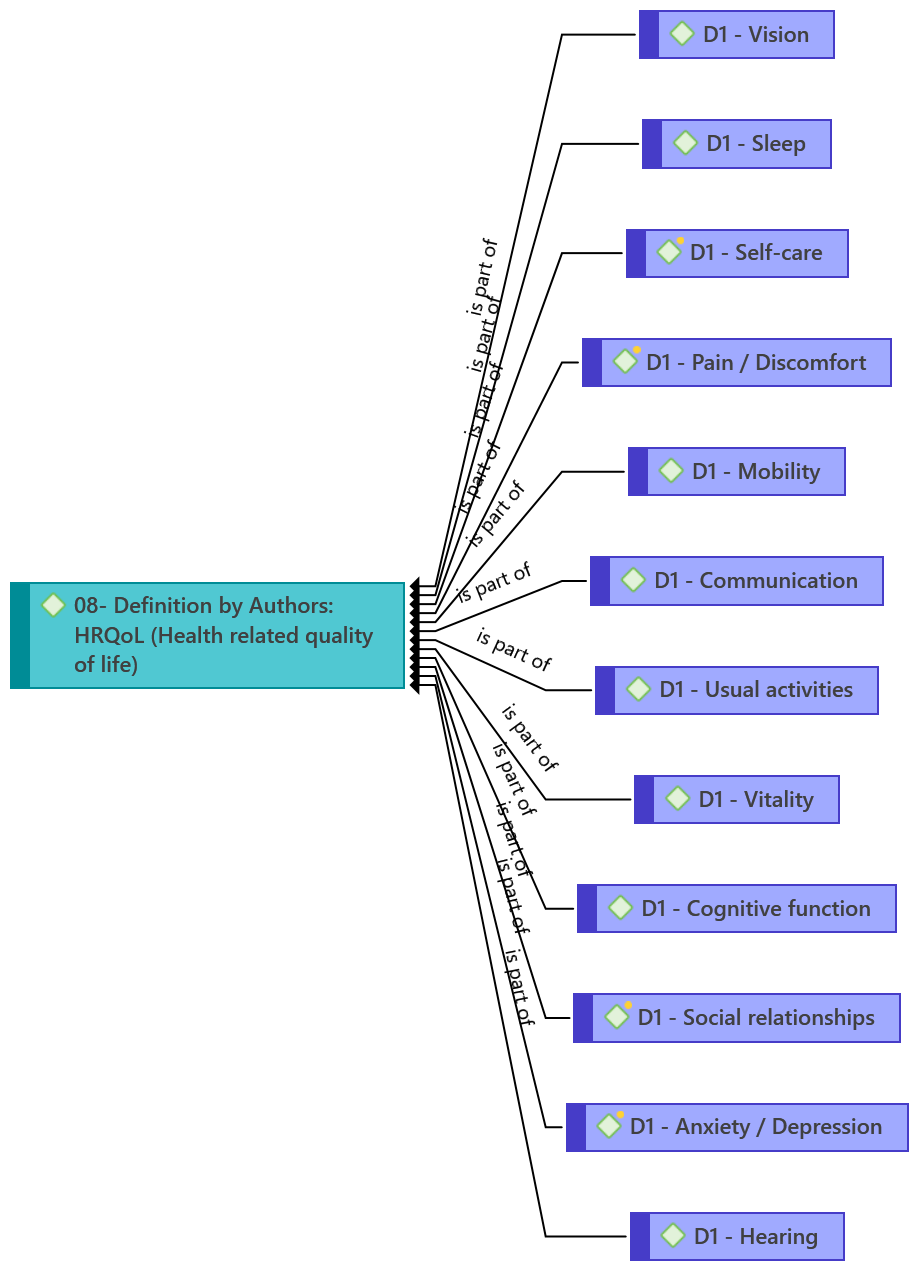
 Mukuria
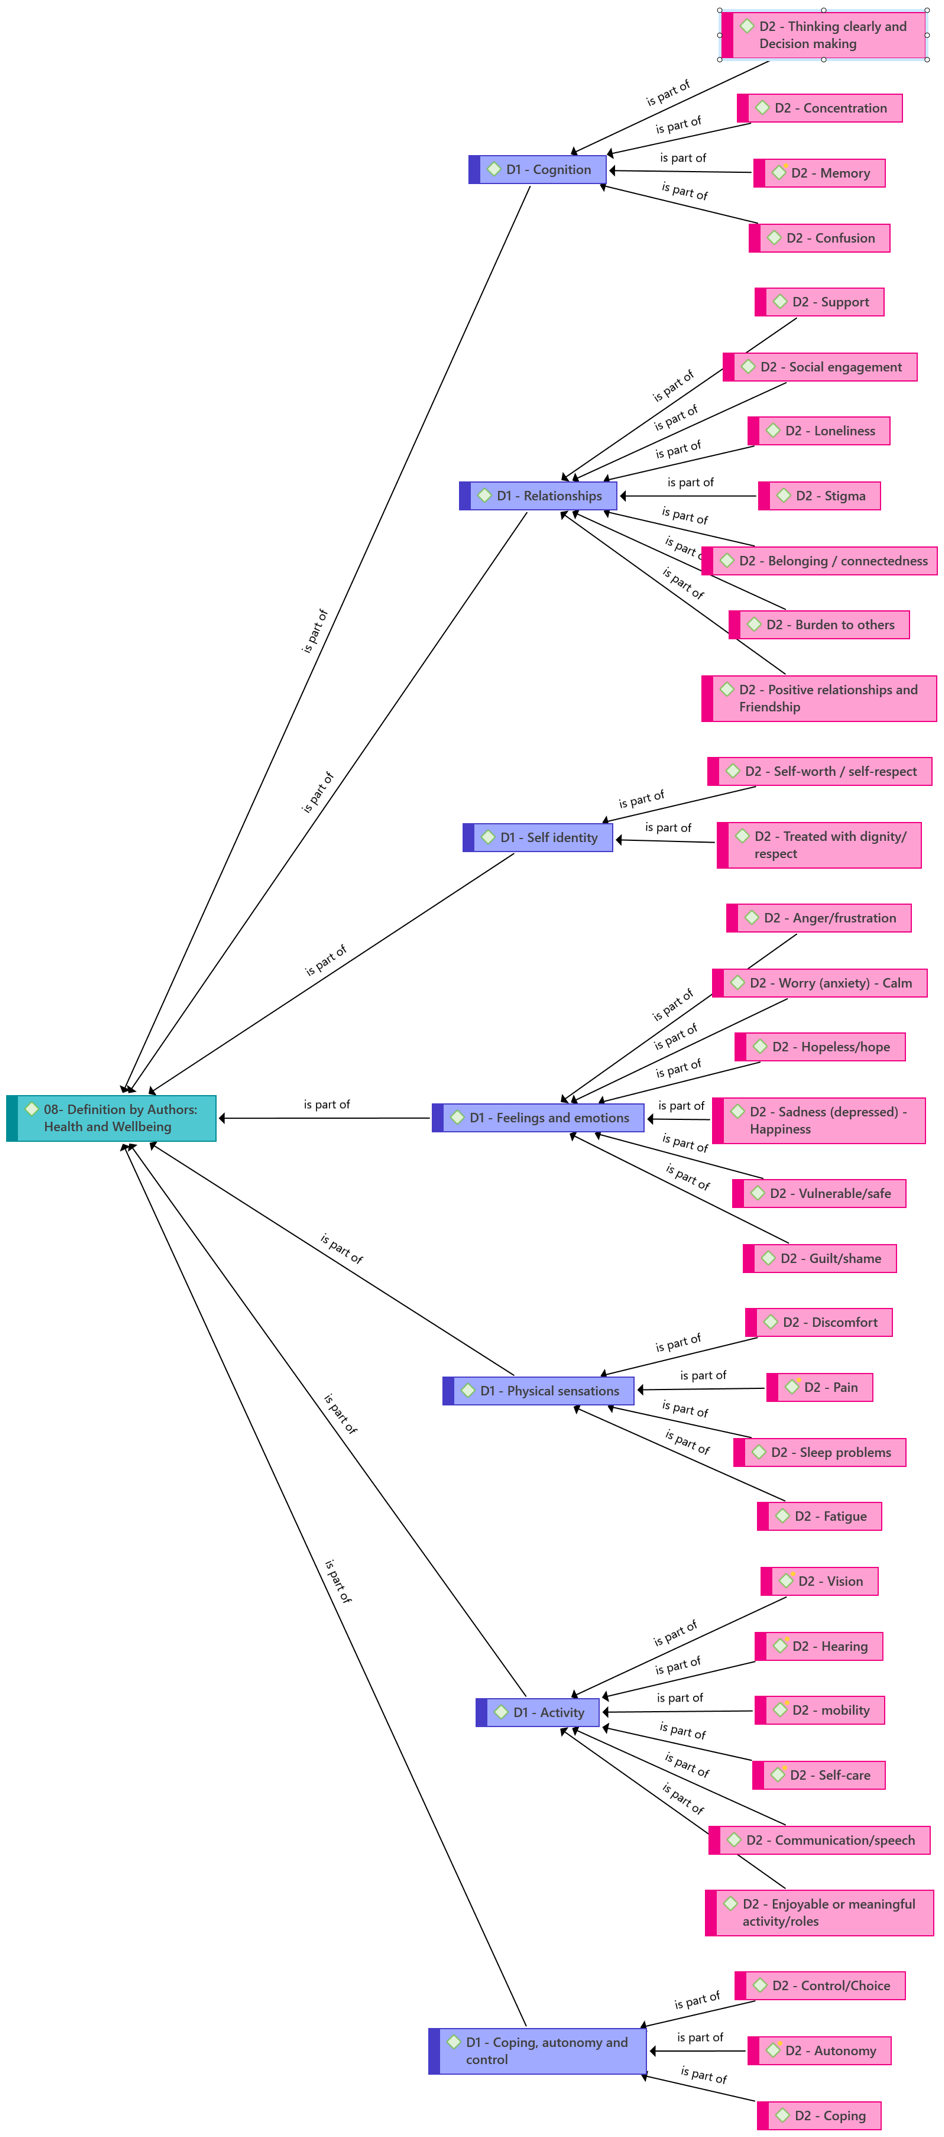
 Thumboo
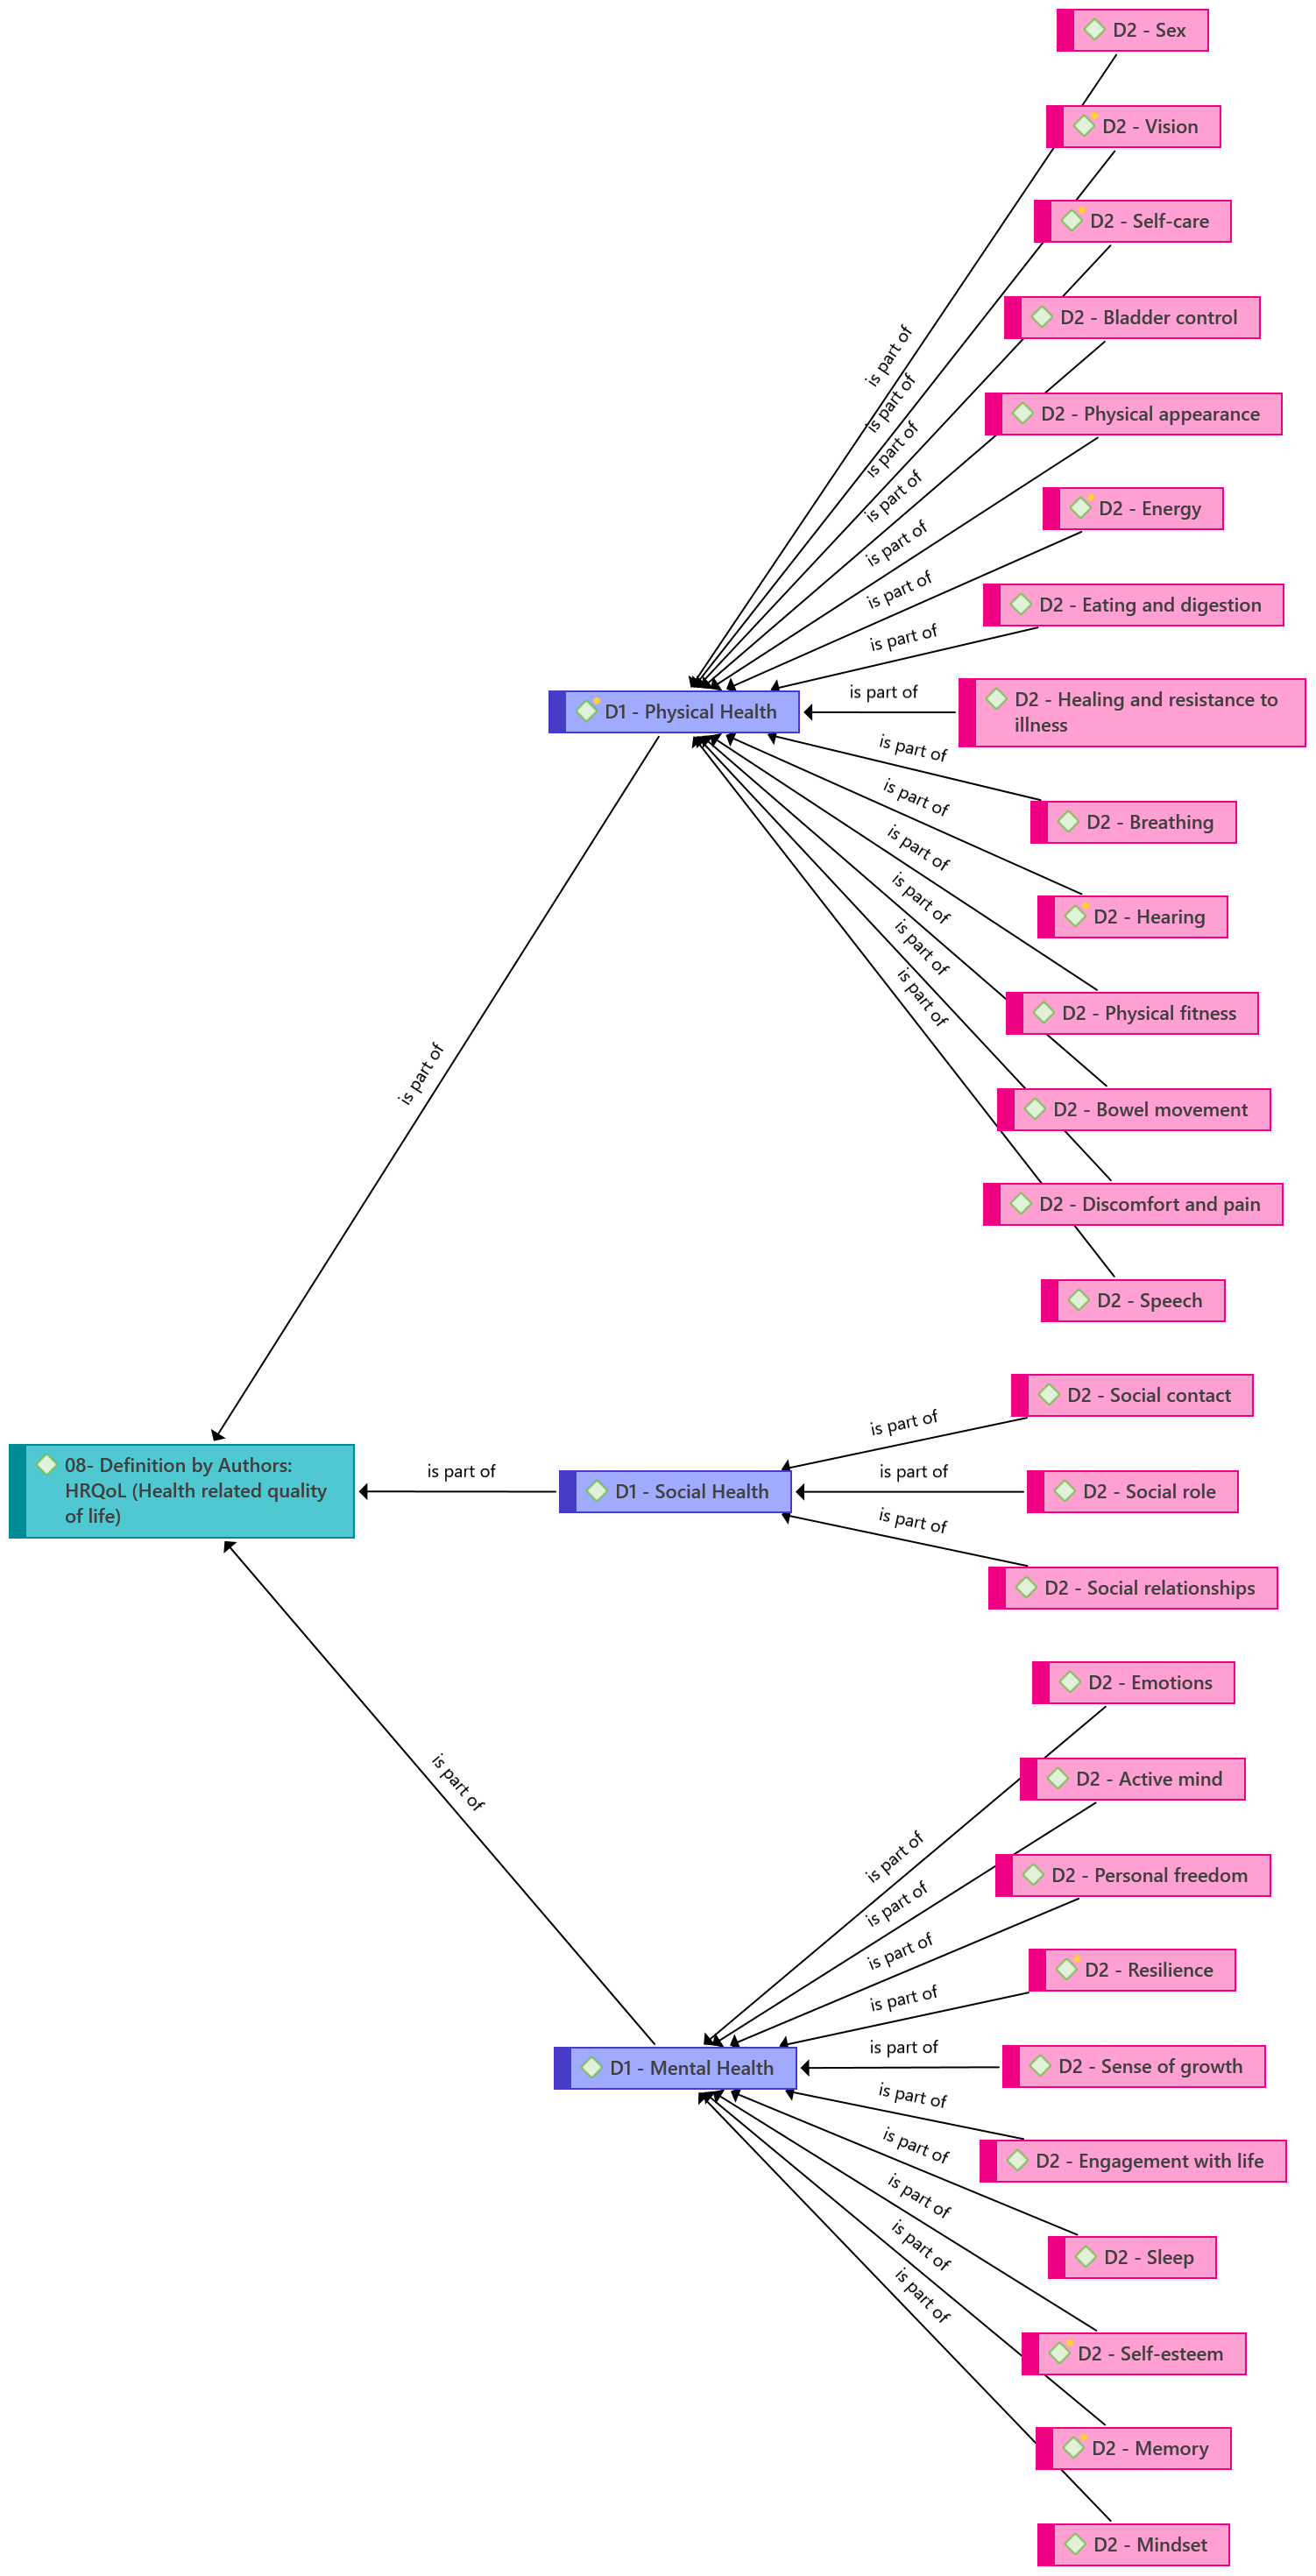
 Willroth
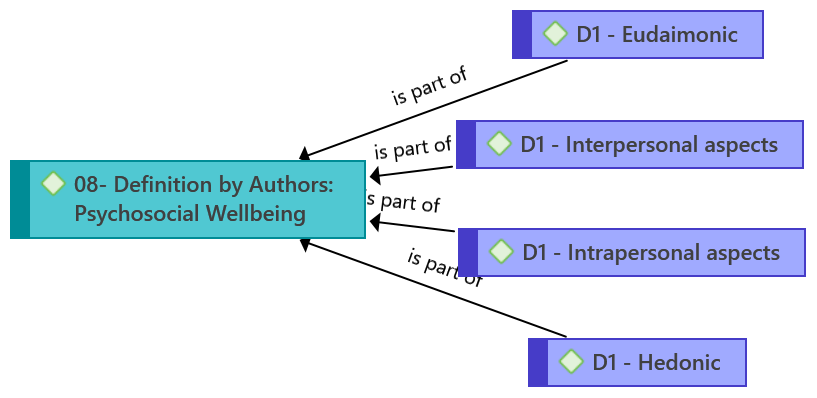
 Toure
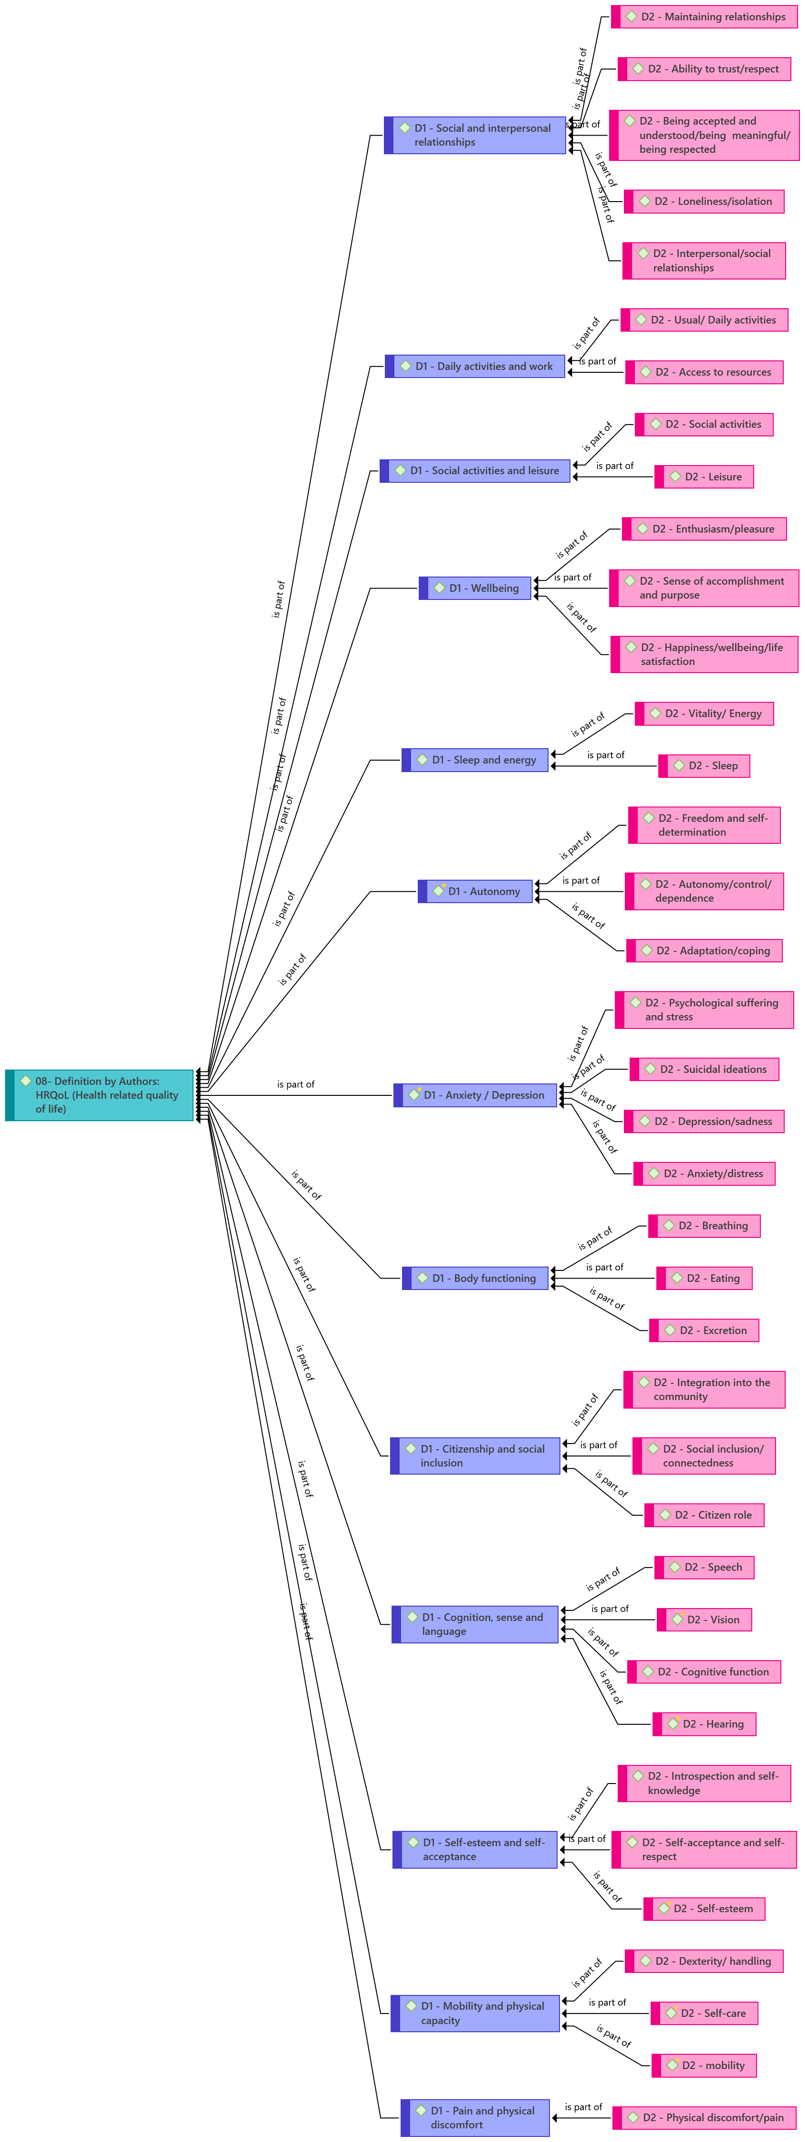
 Suavansri
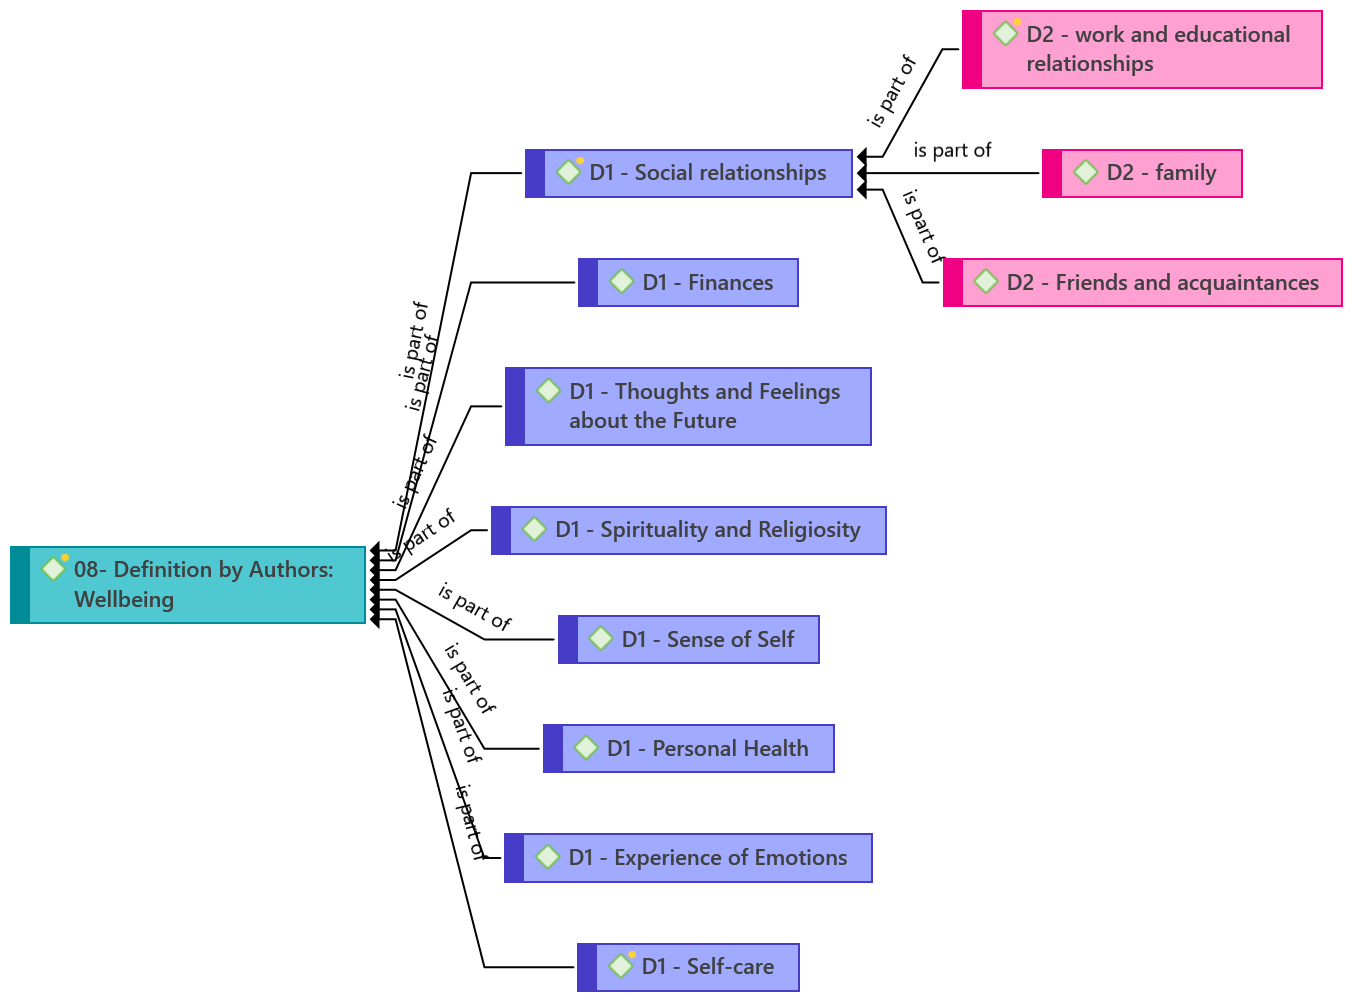
 Schalock
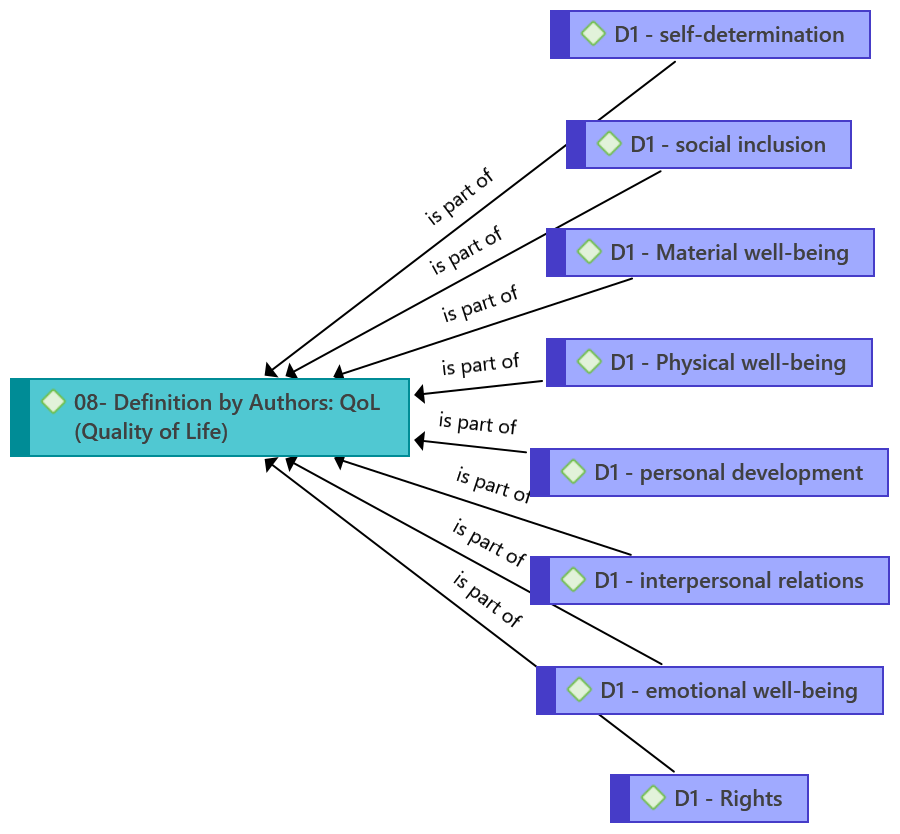


Park
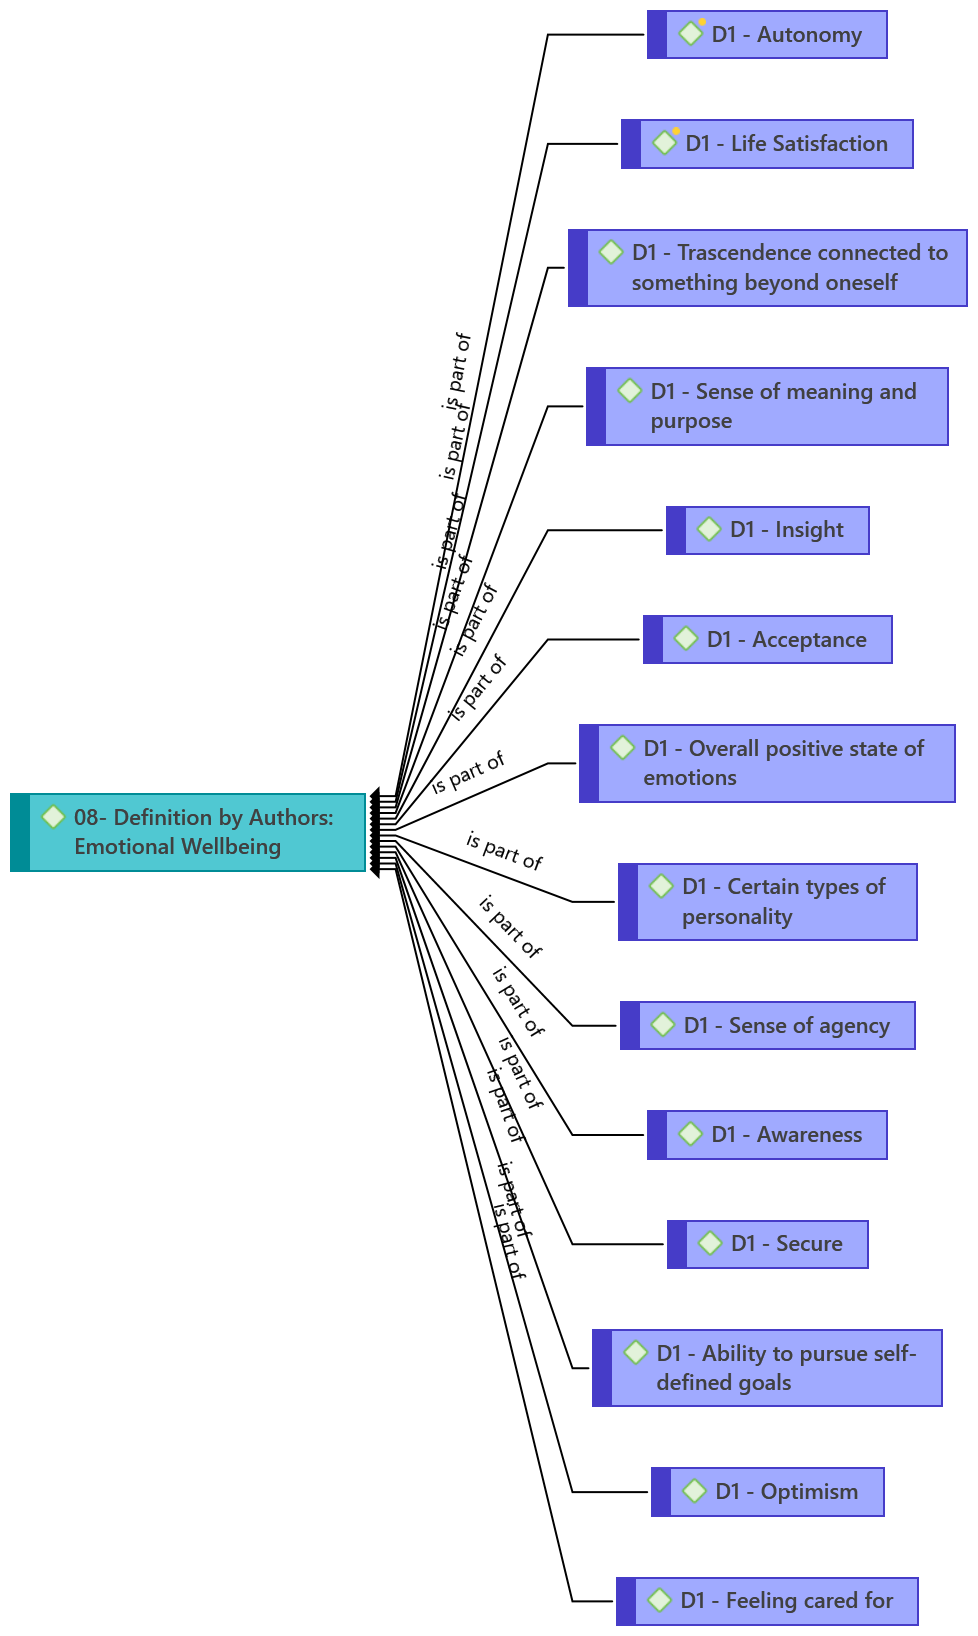


Marsh
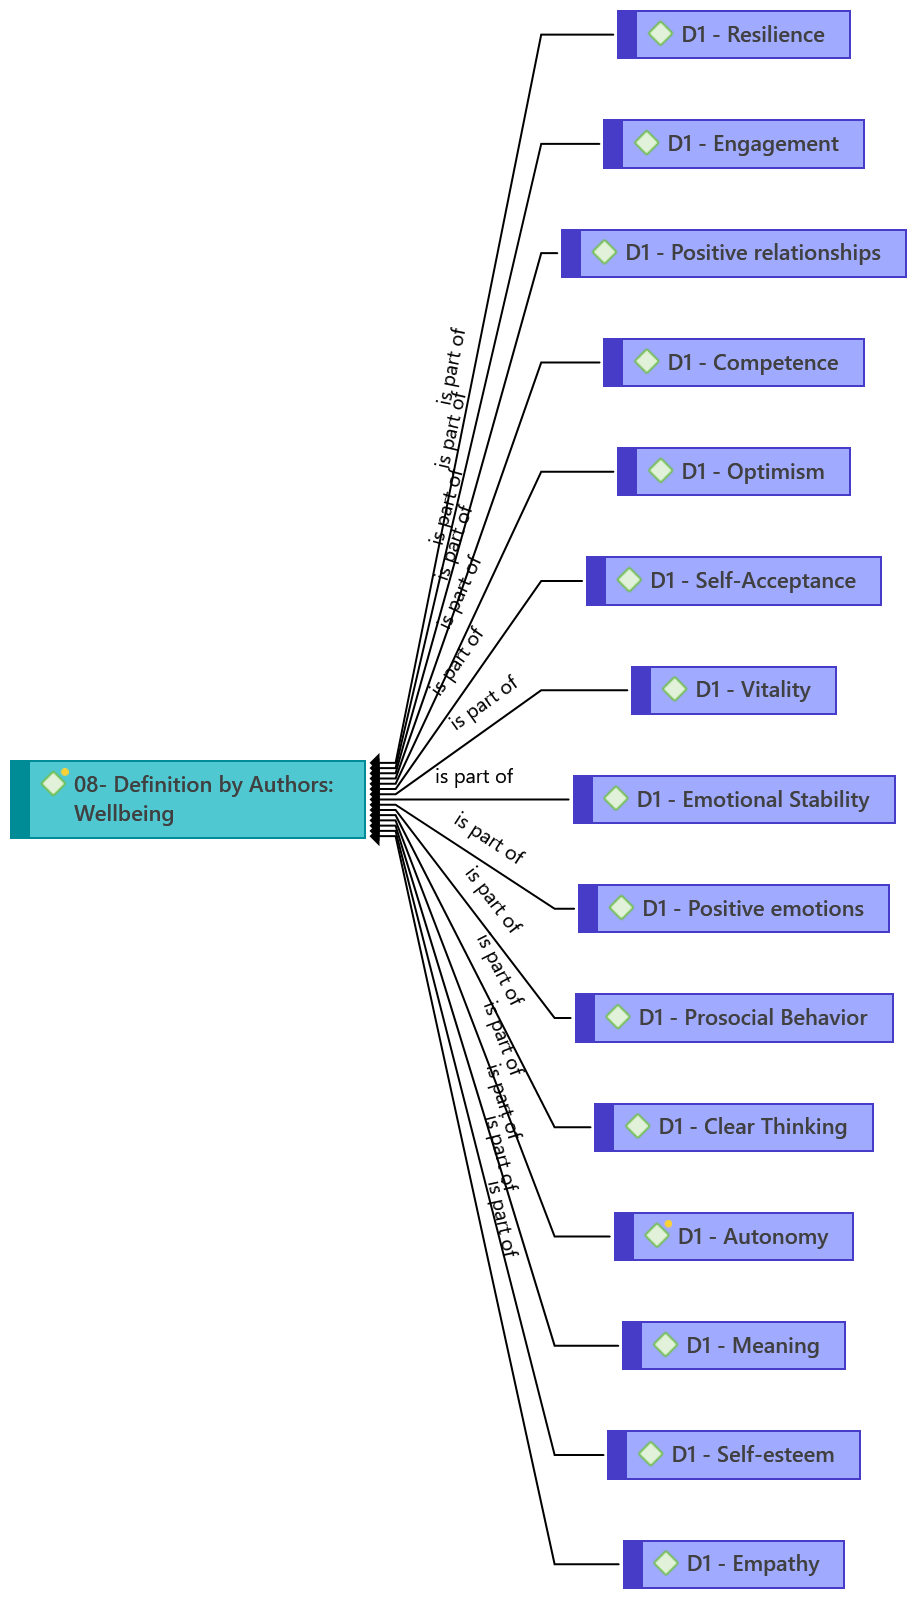


Mao
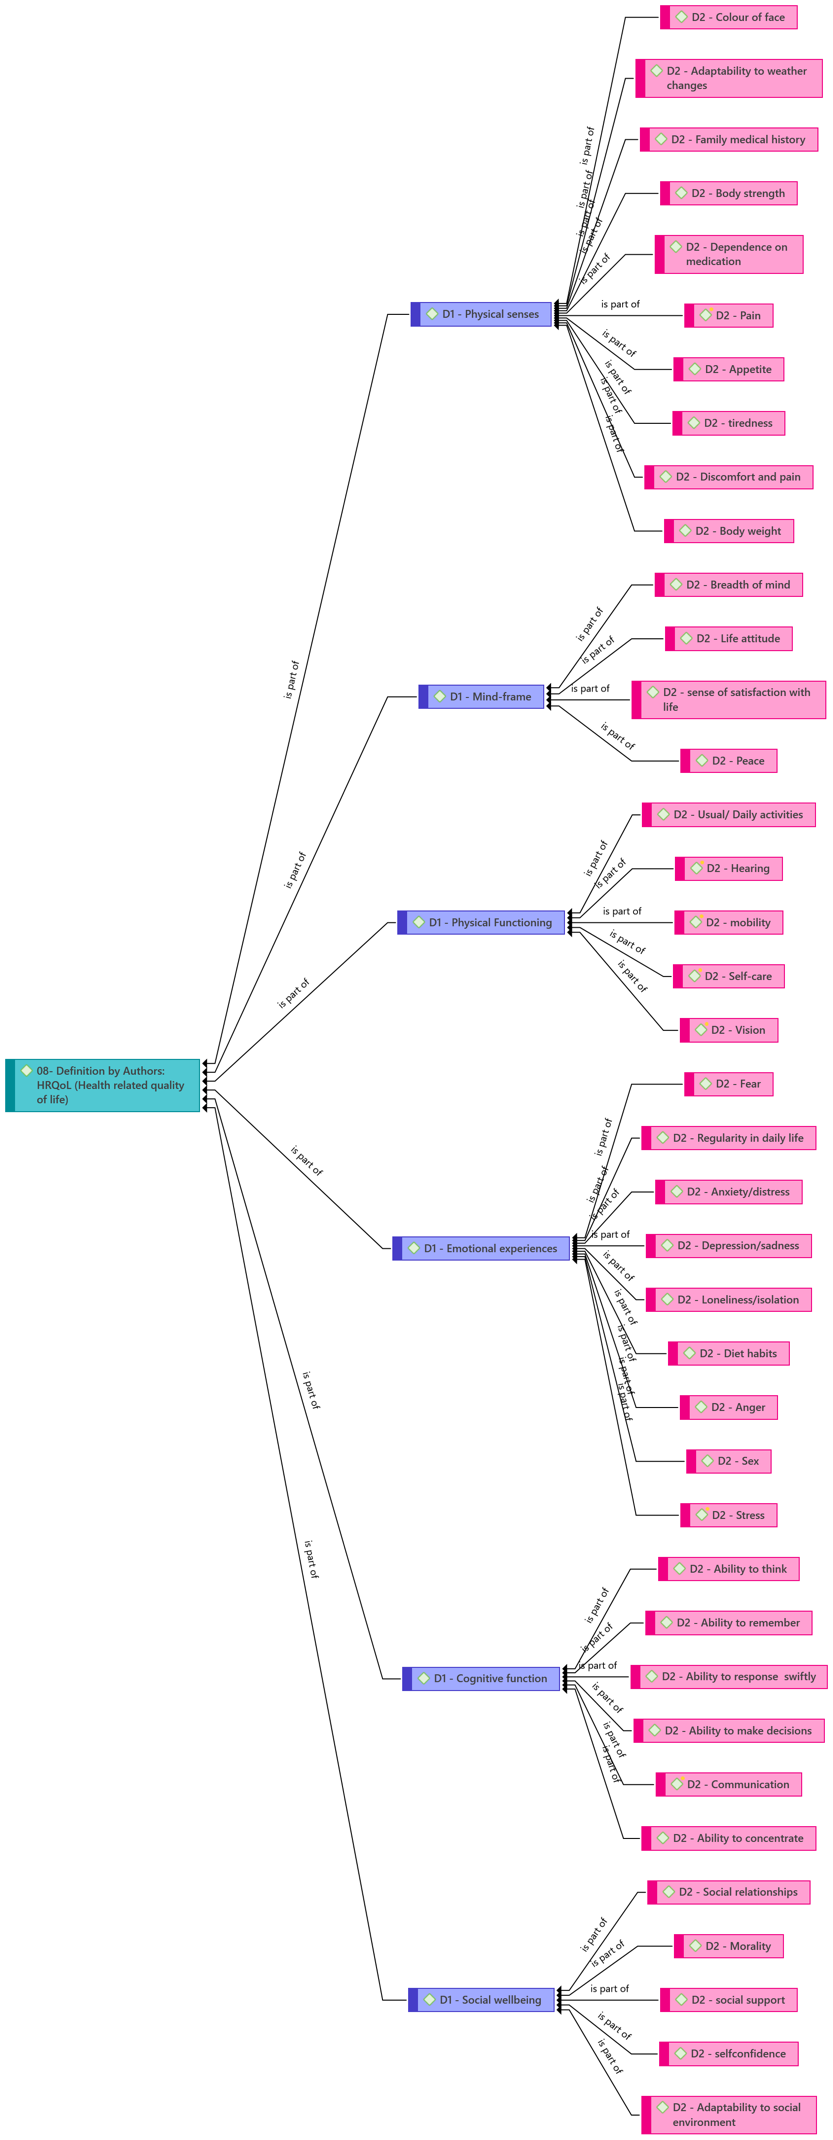


Manolom
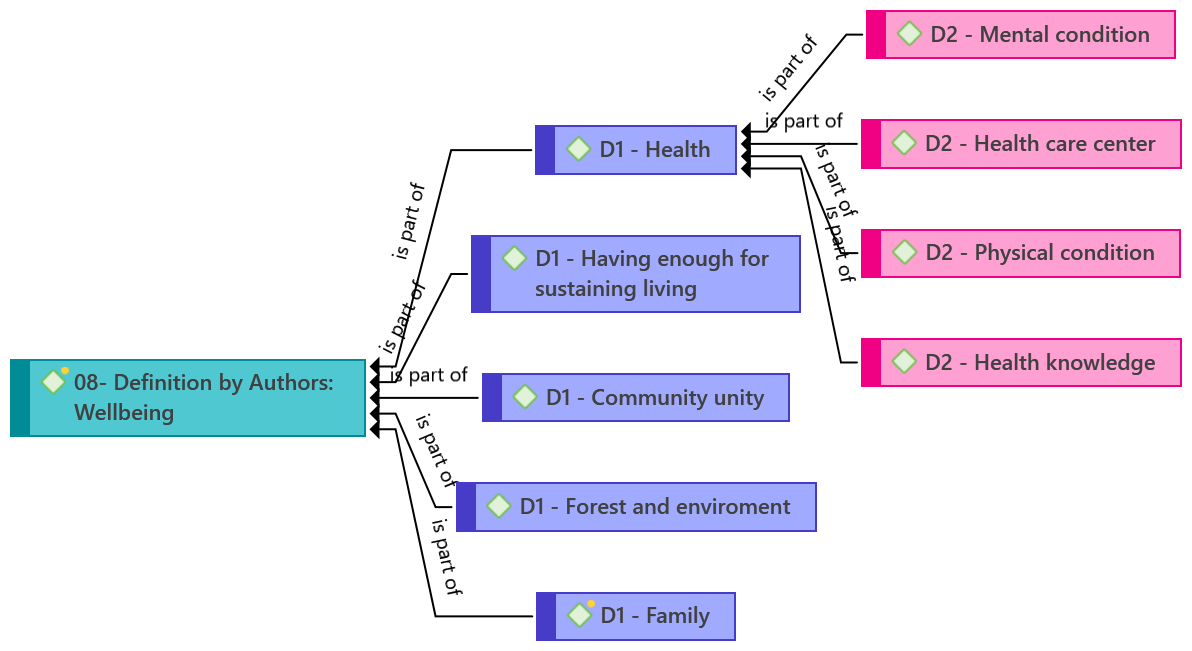
 Larsen
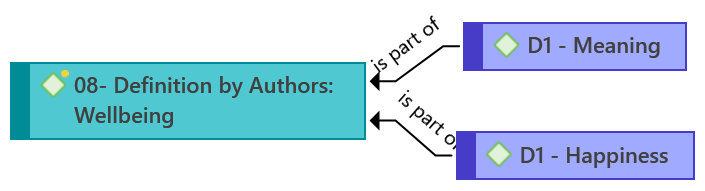


Bragin
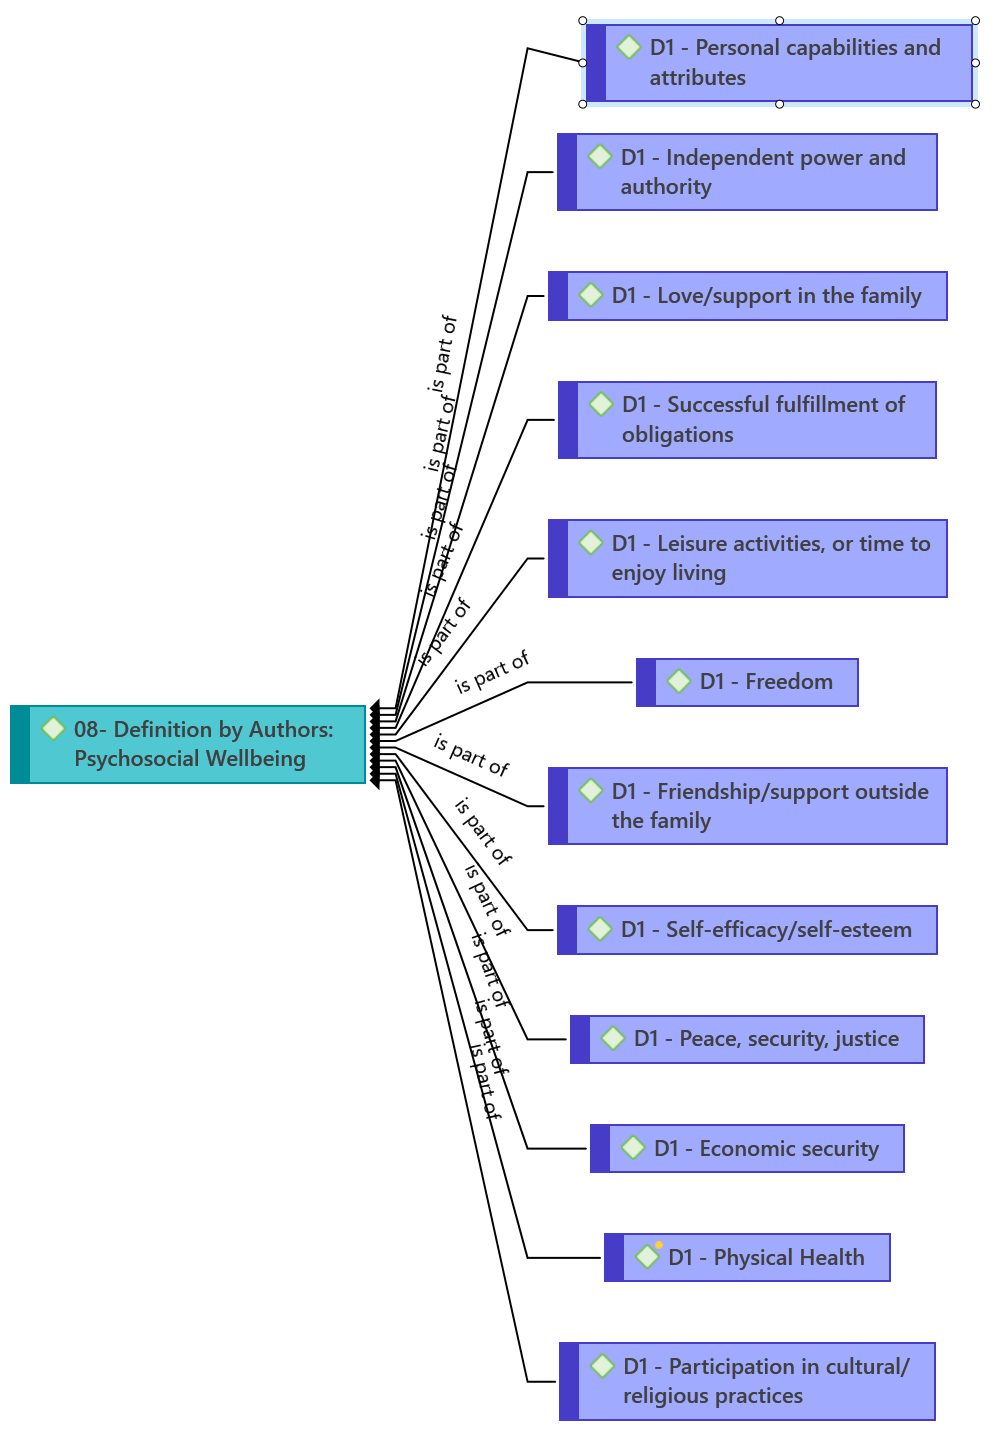


Gallagher
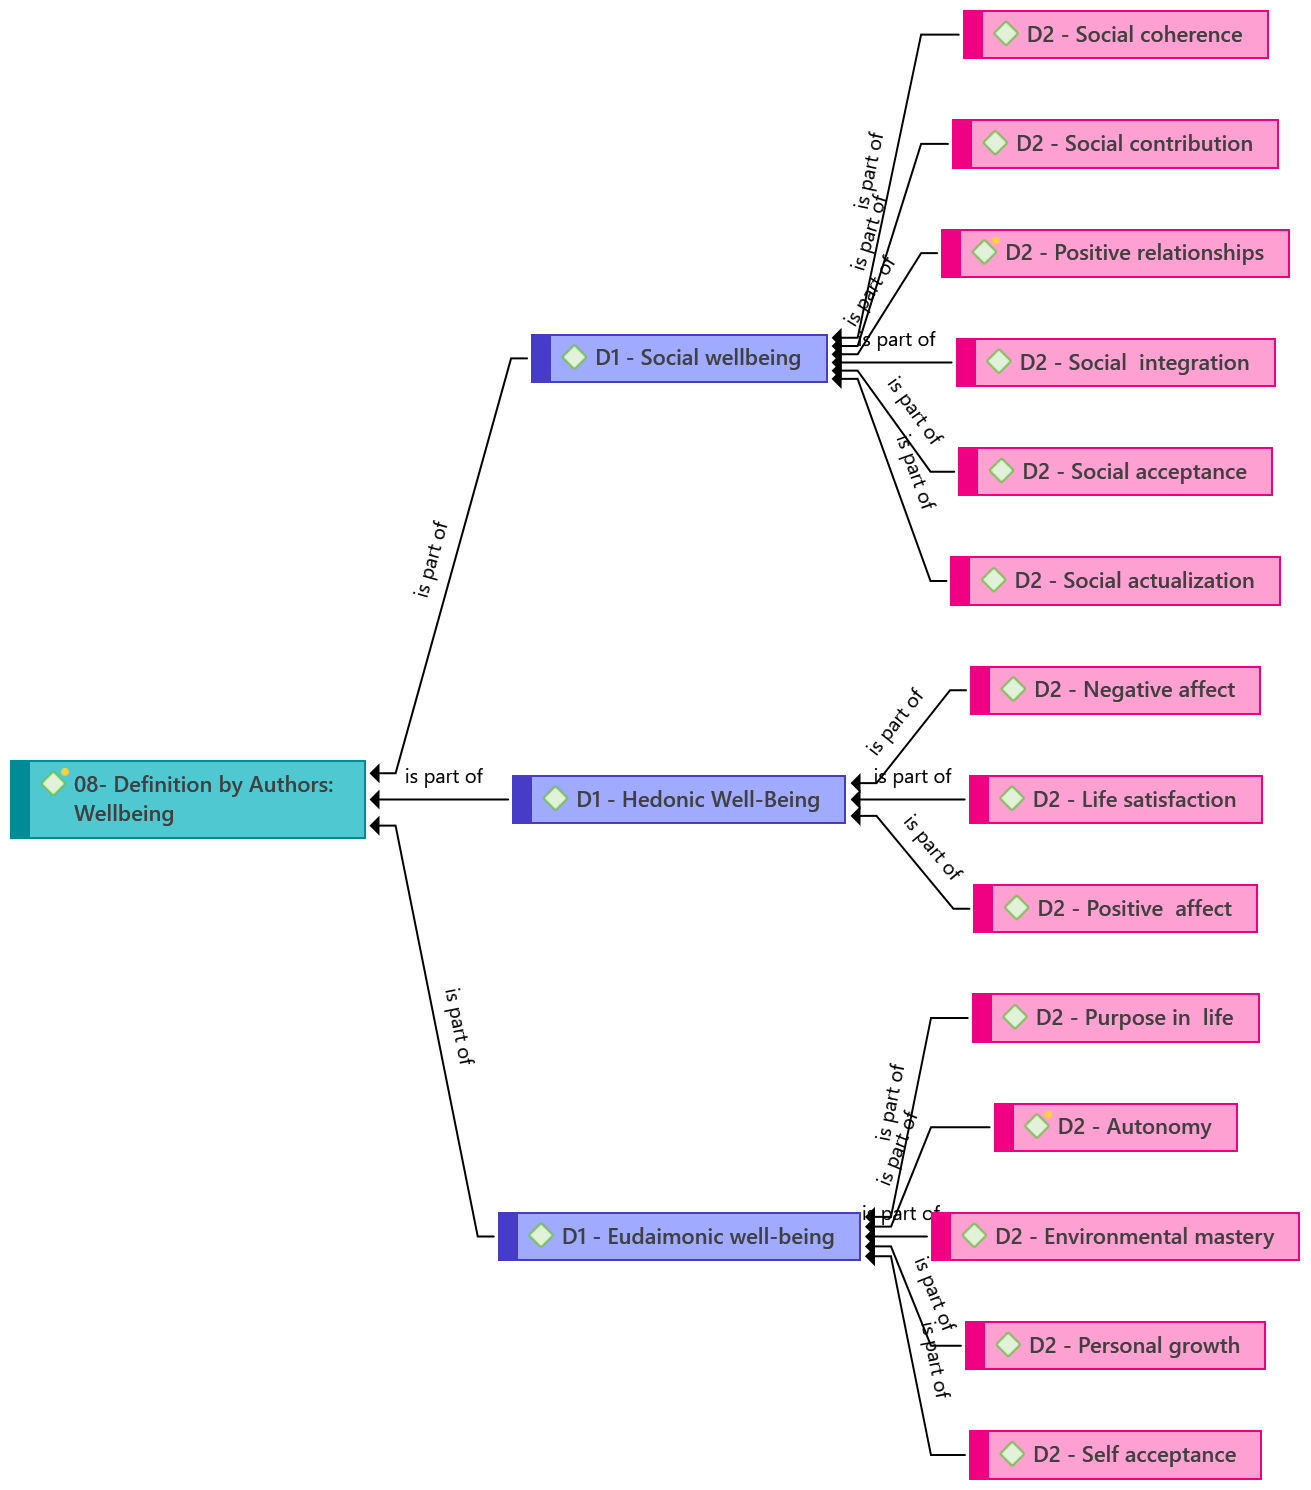


HUNT
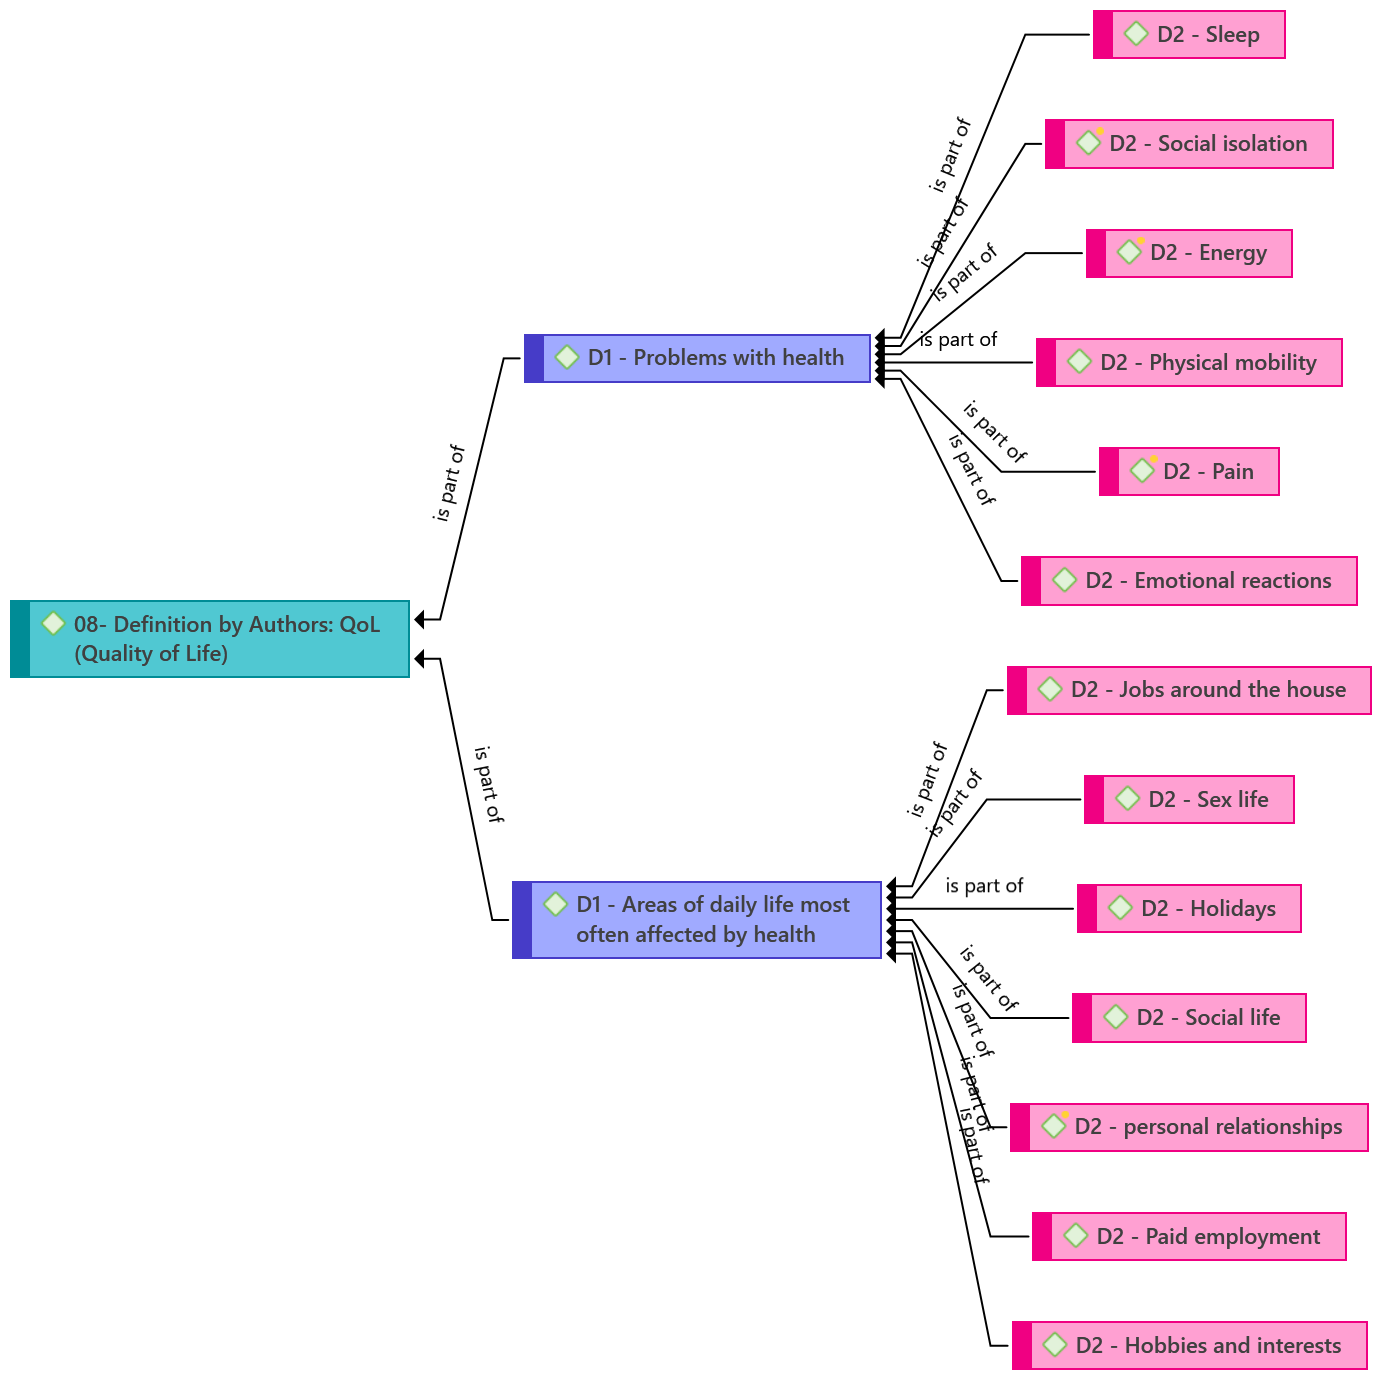


Janabi
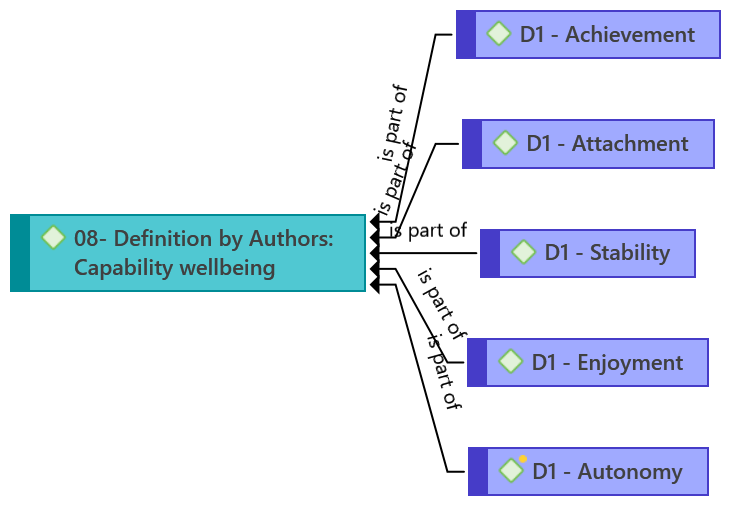
 Kaplan
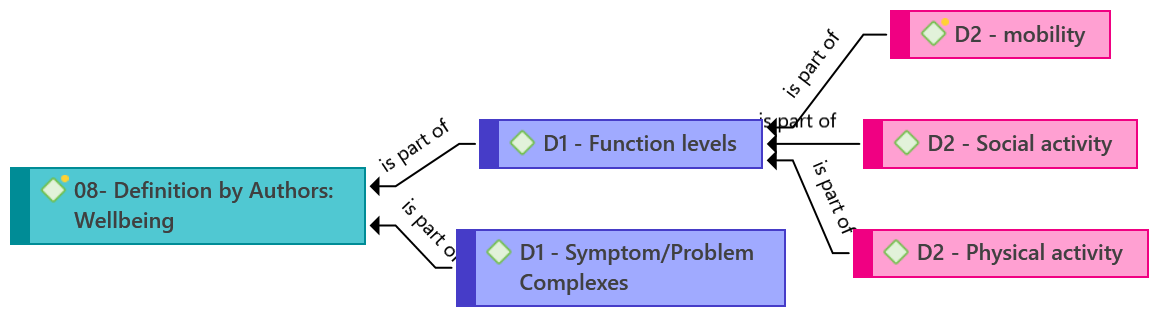


Olsen
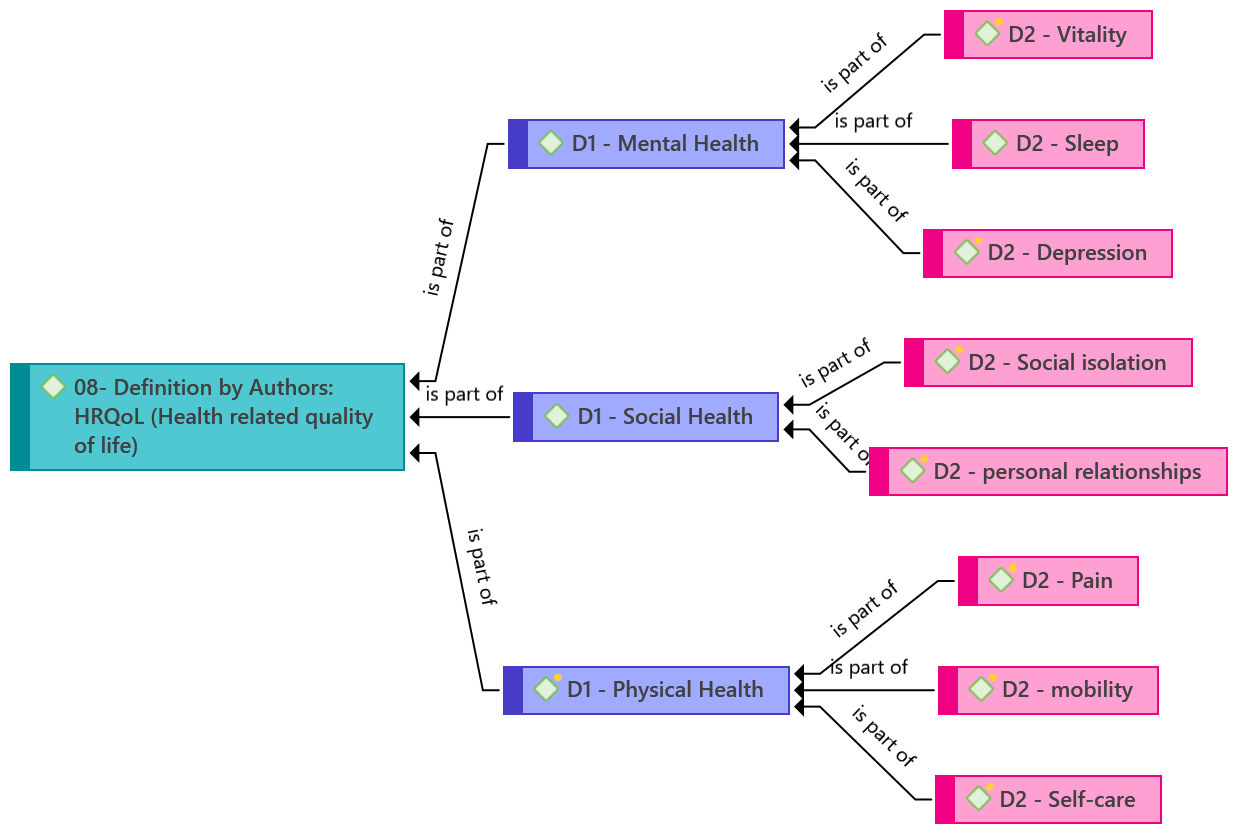


Richardson
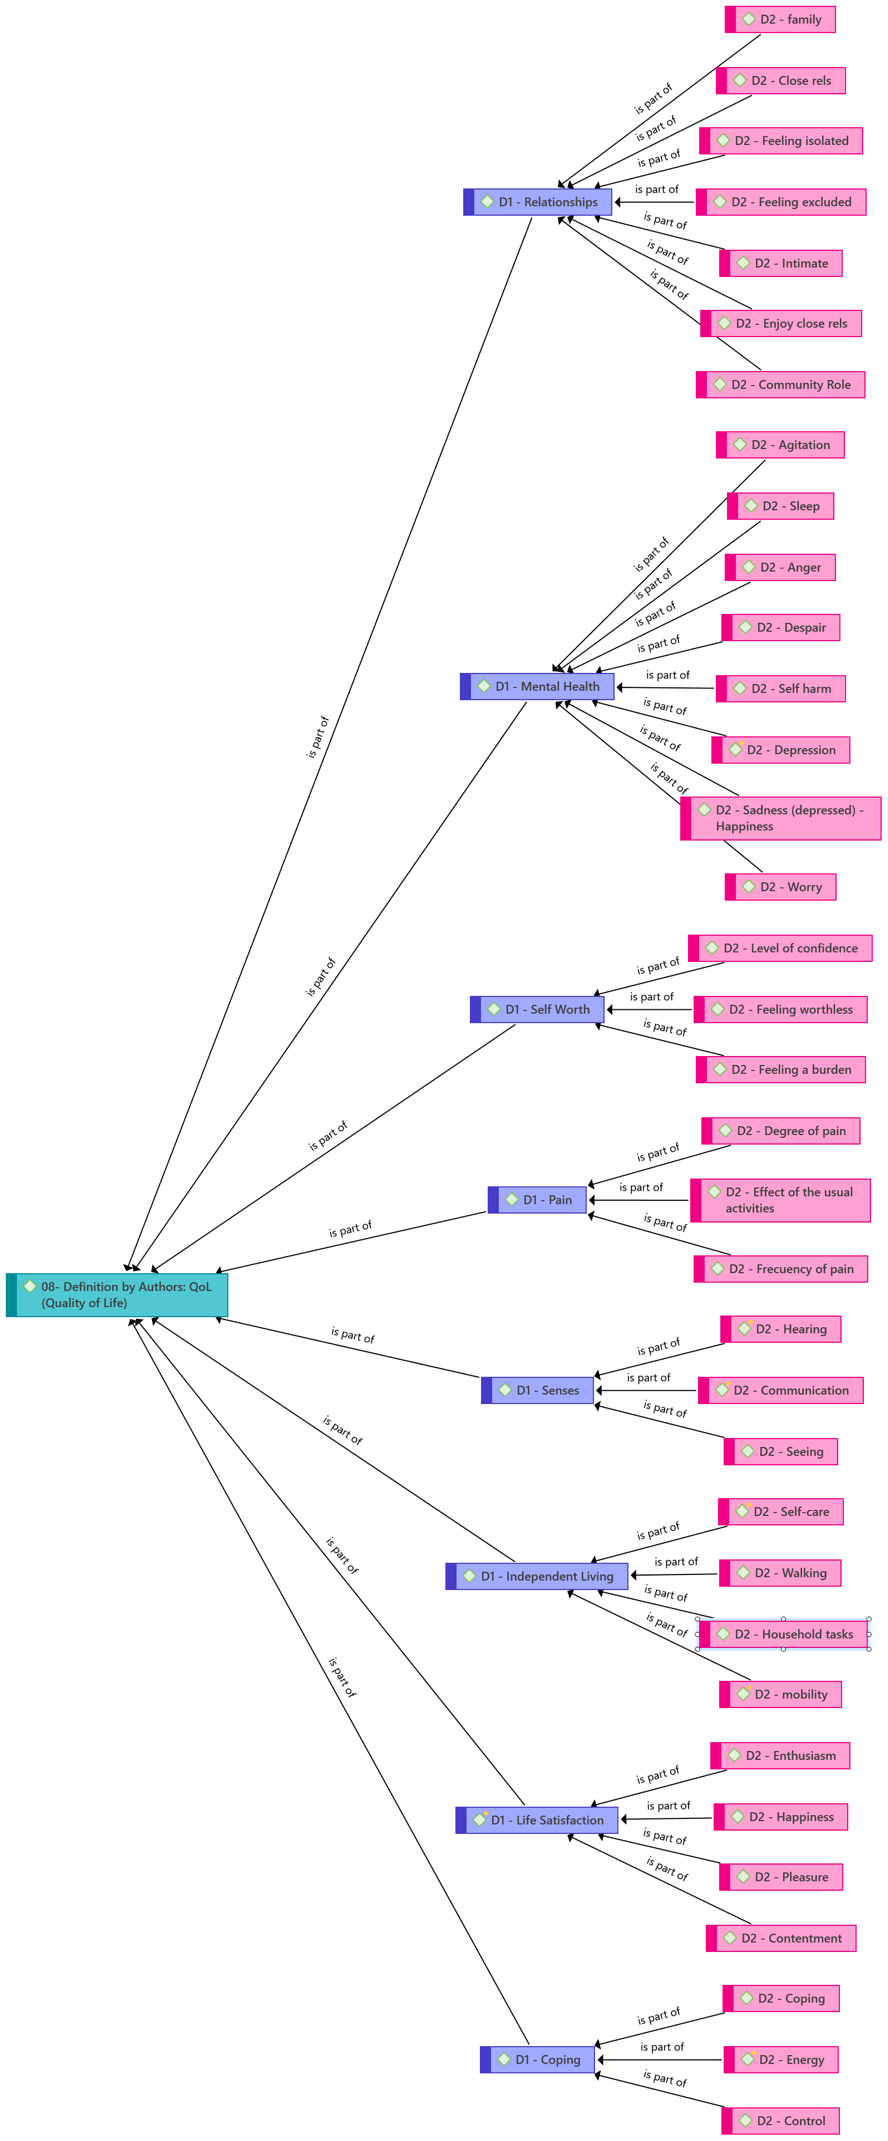
 Arthaud
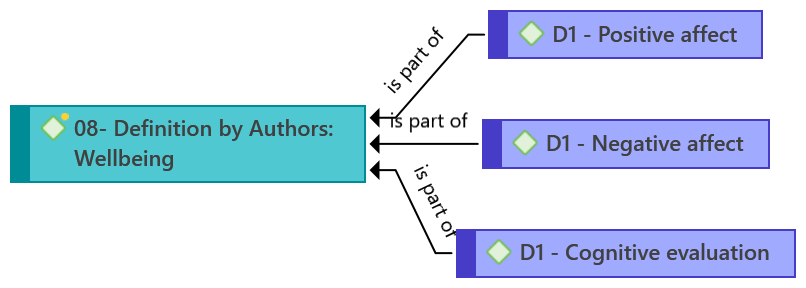


Breslow
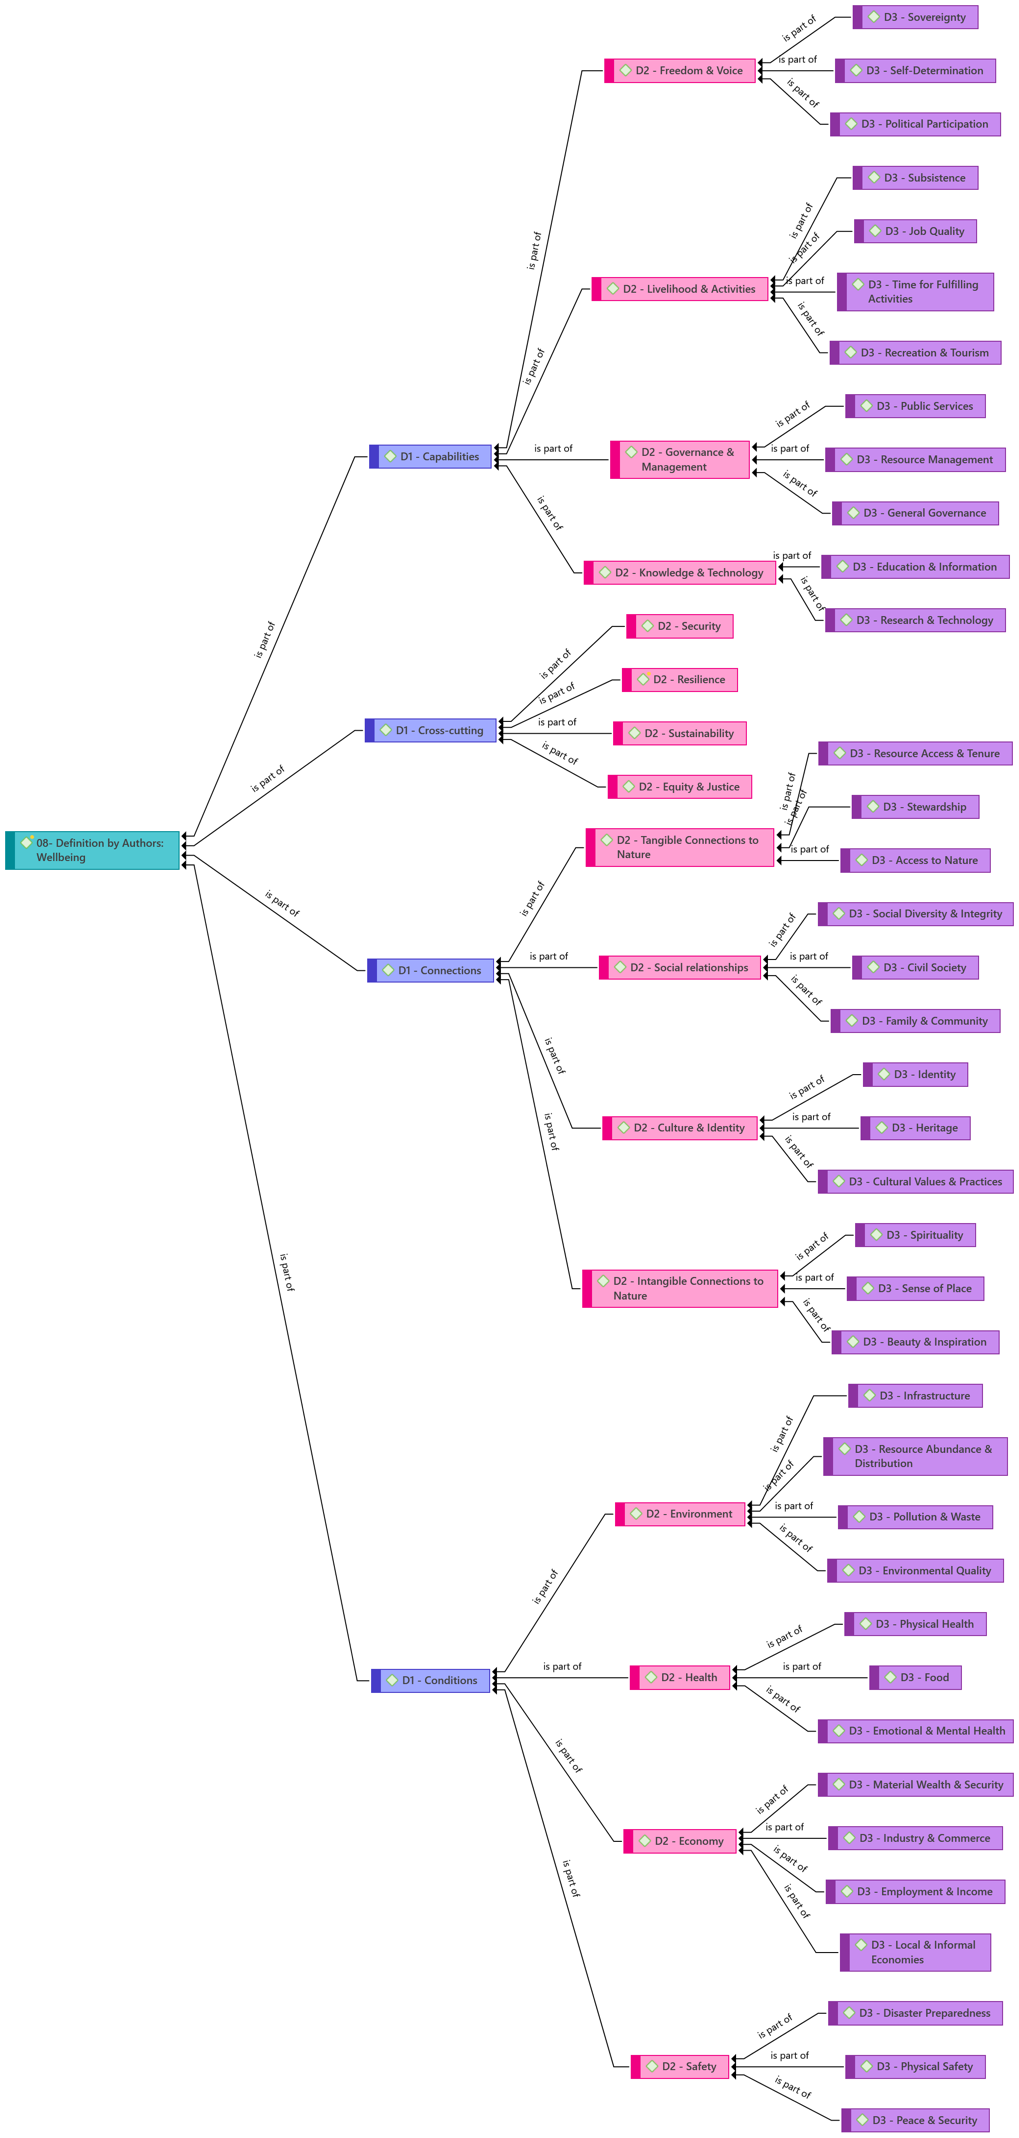
 Euroqol
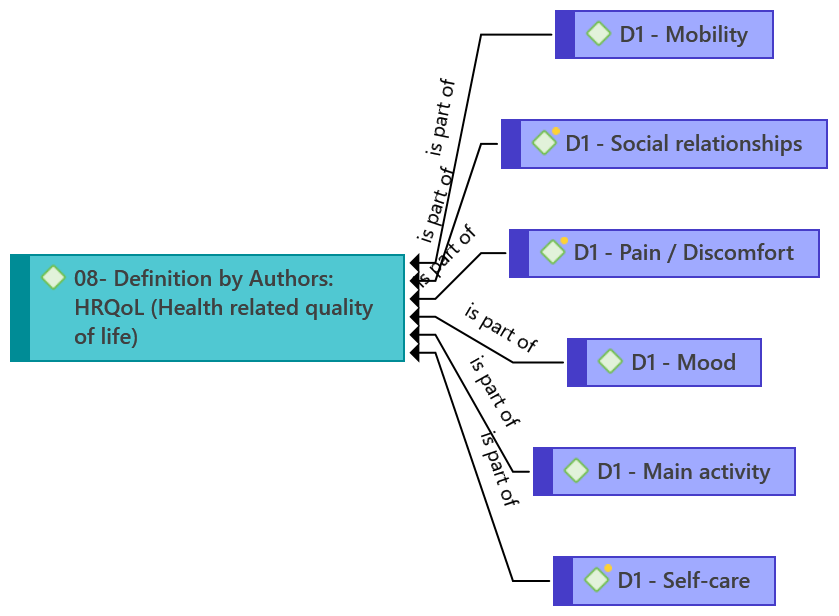
 Felce
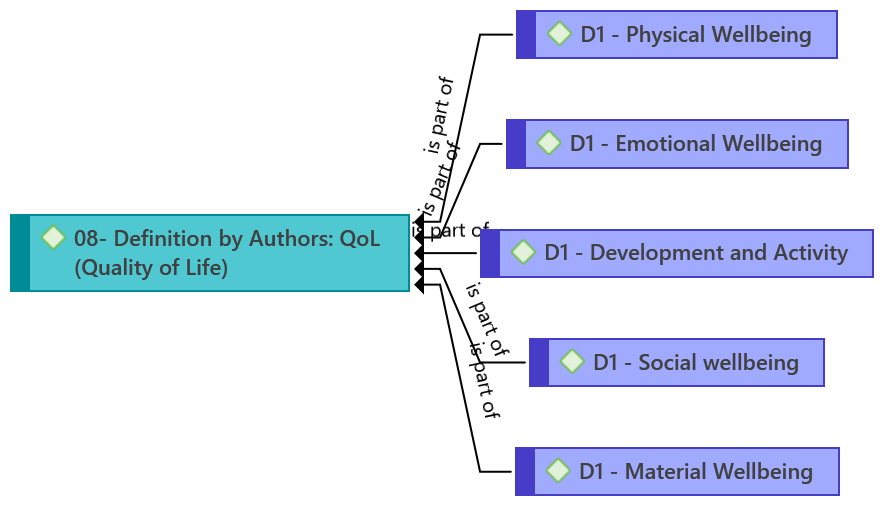


Wilson
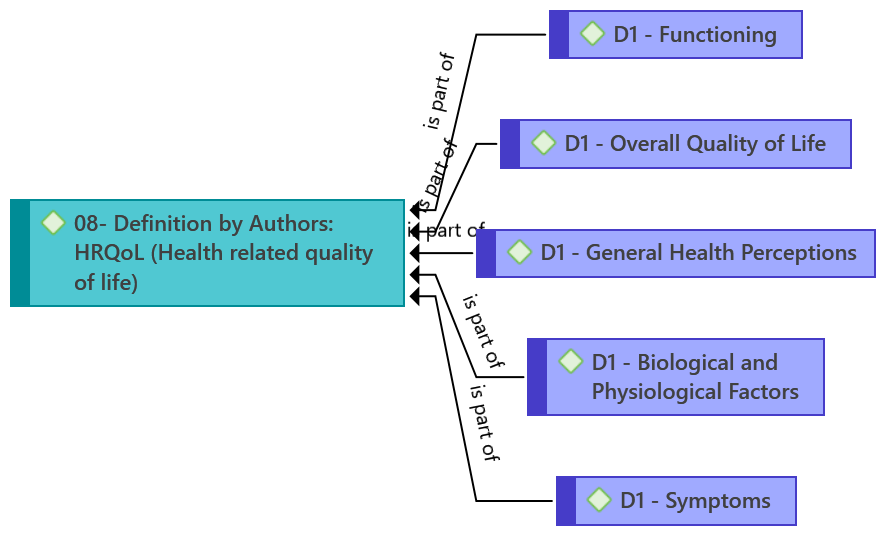
 Cella
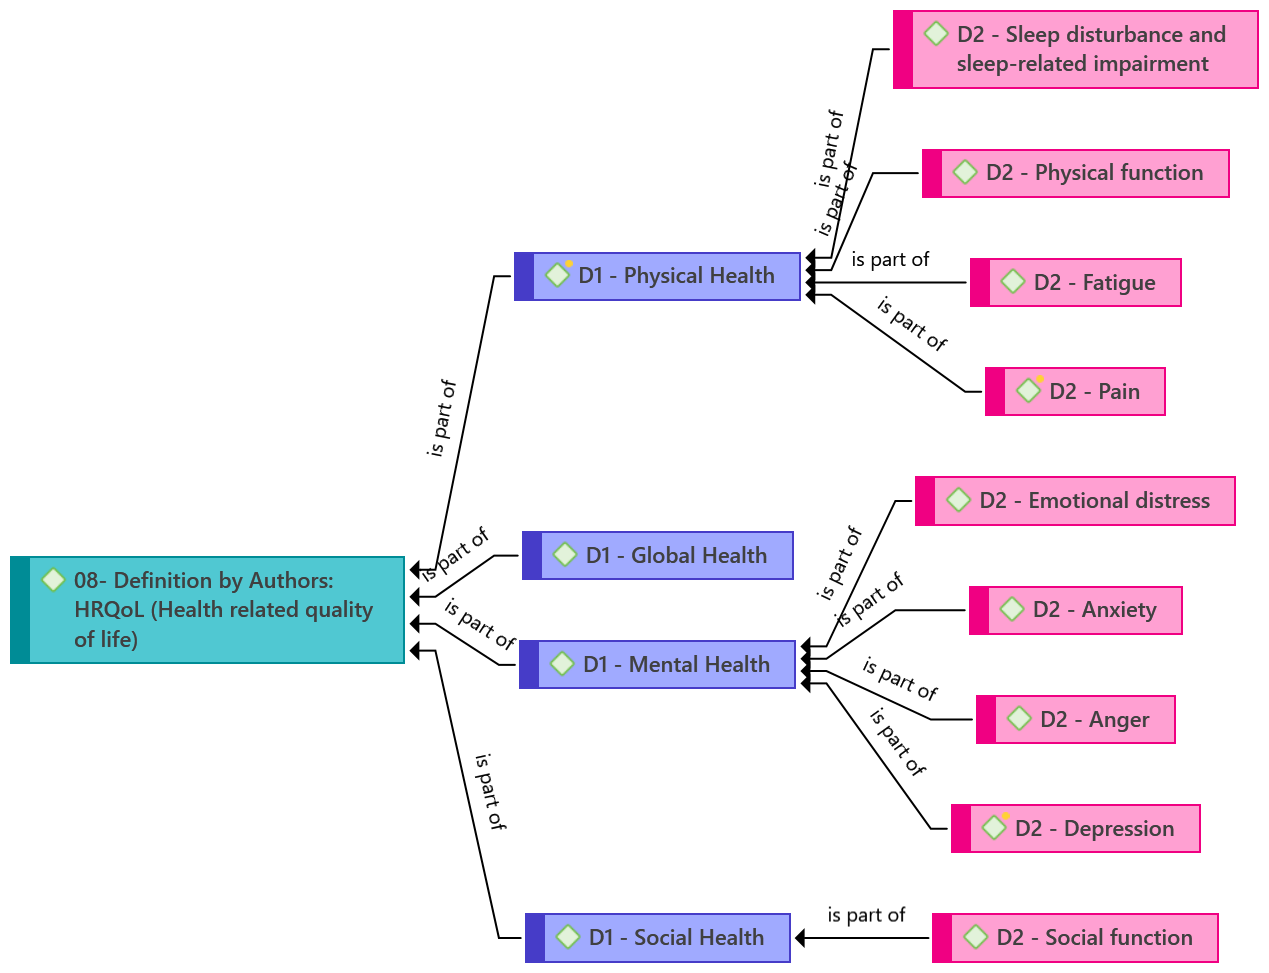


Van Weel
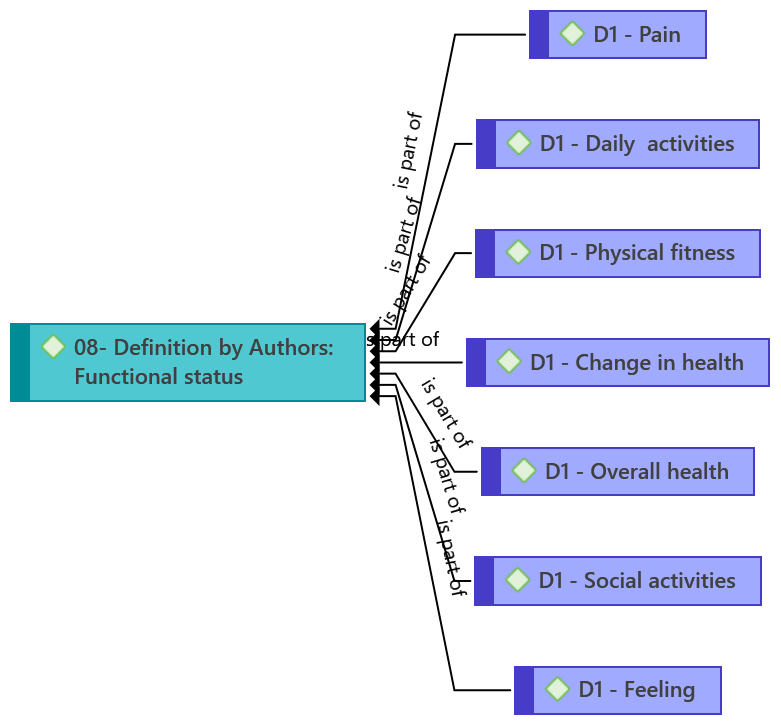


Colleen
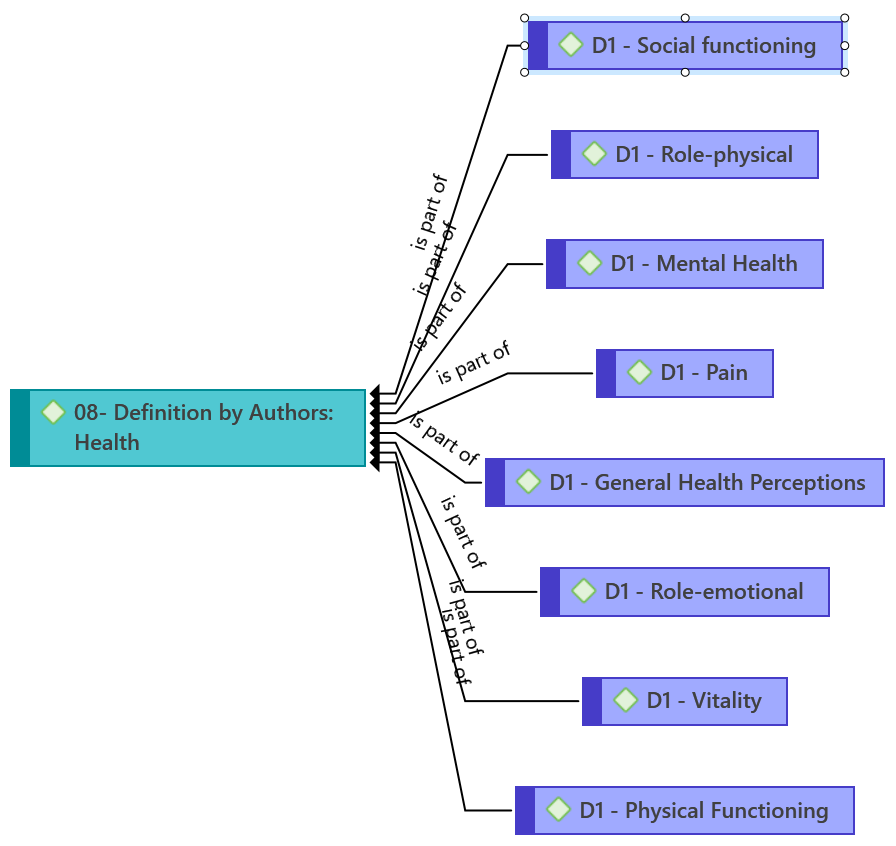


Rodriguez Espinosa
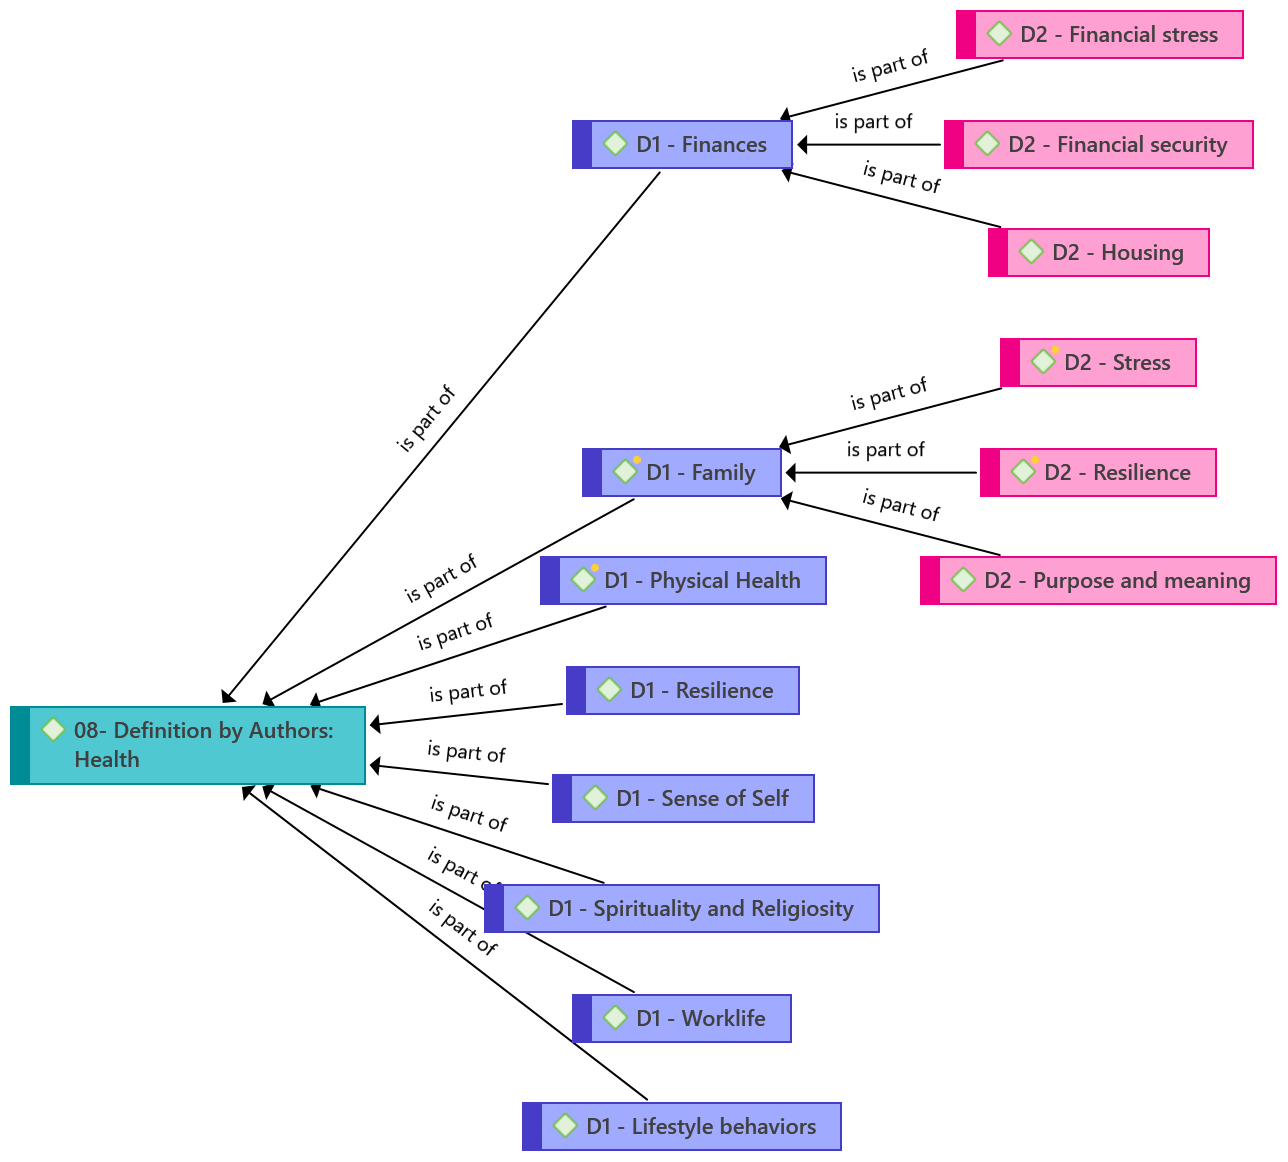


Rodriguez Espinosa
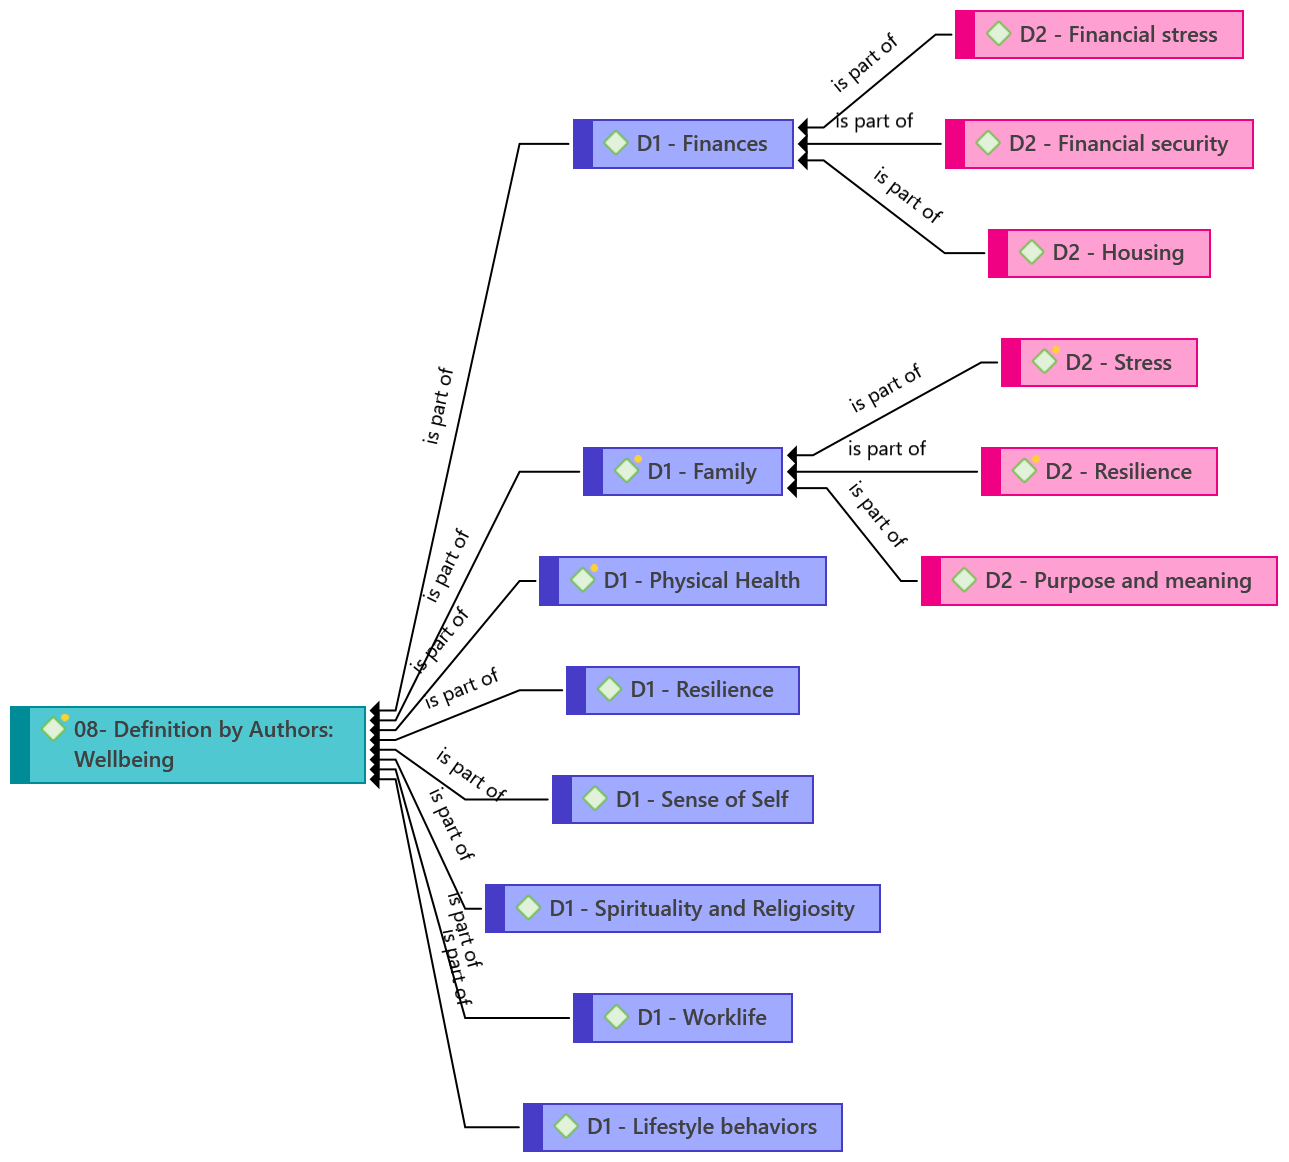


WHOQOL
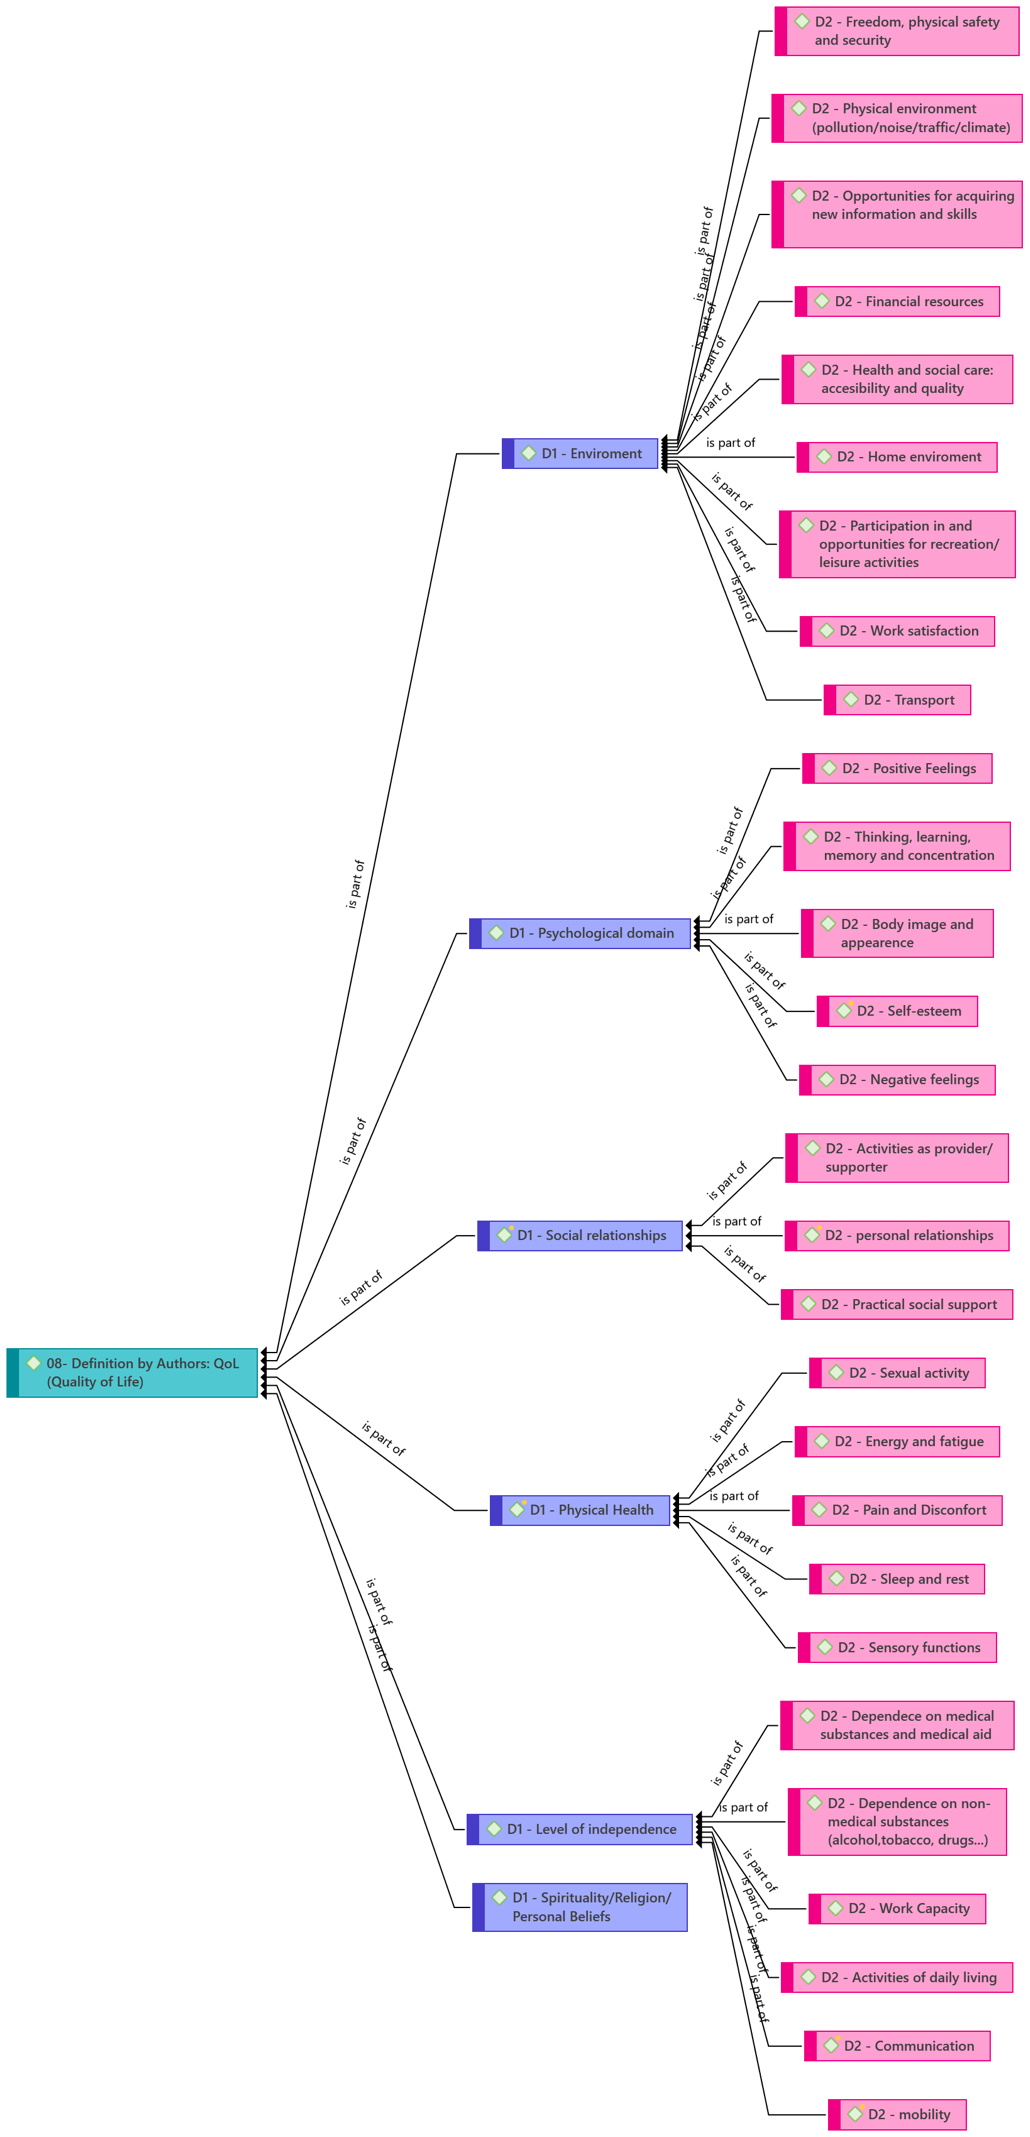


15D
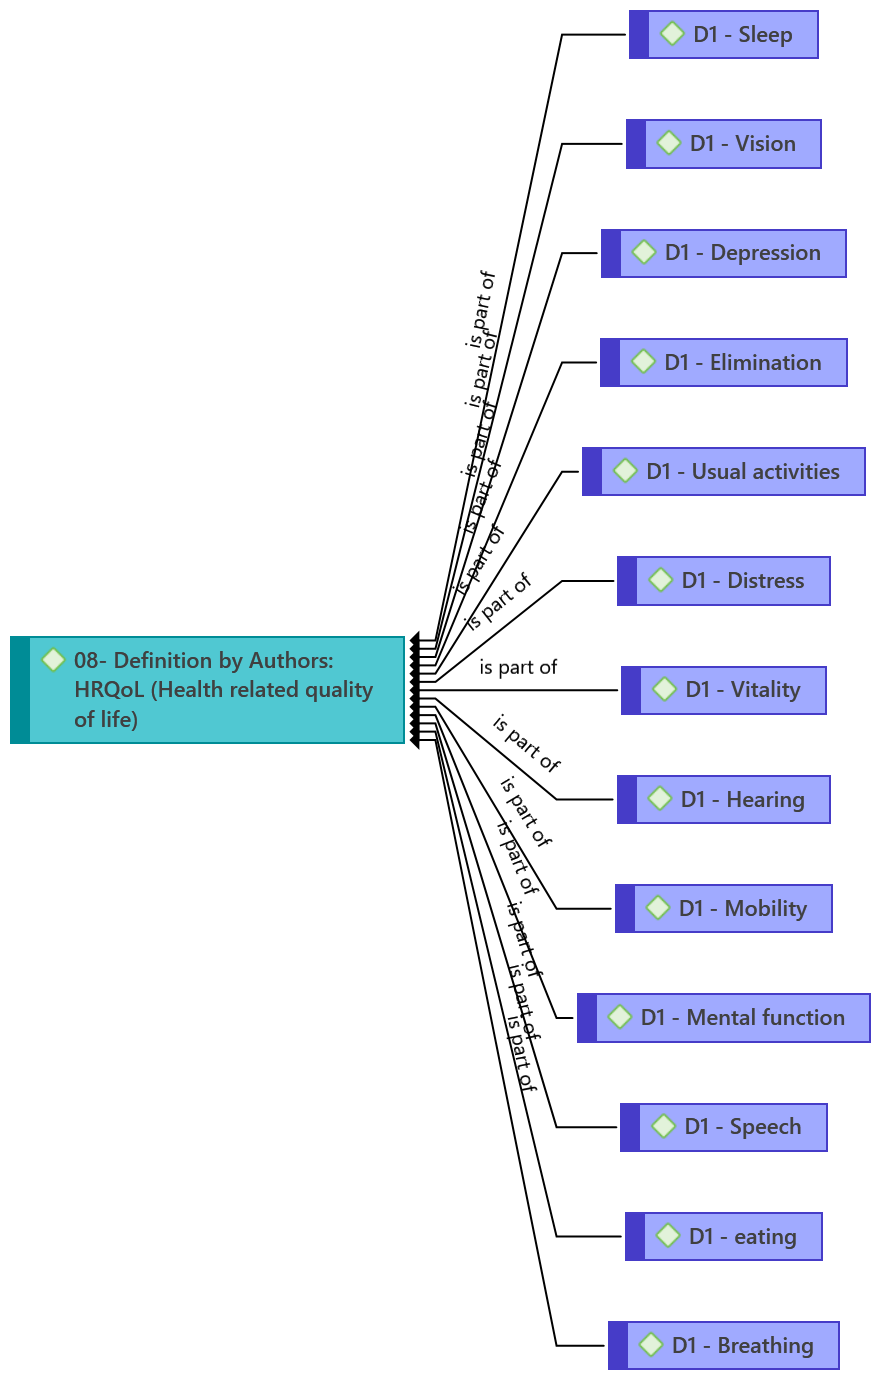
 Krabbe
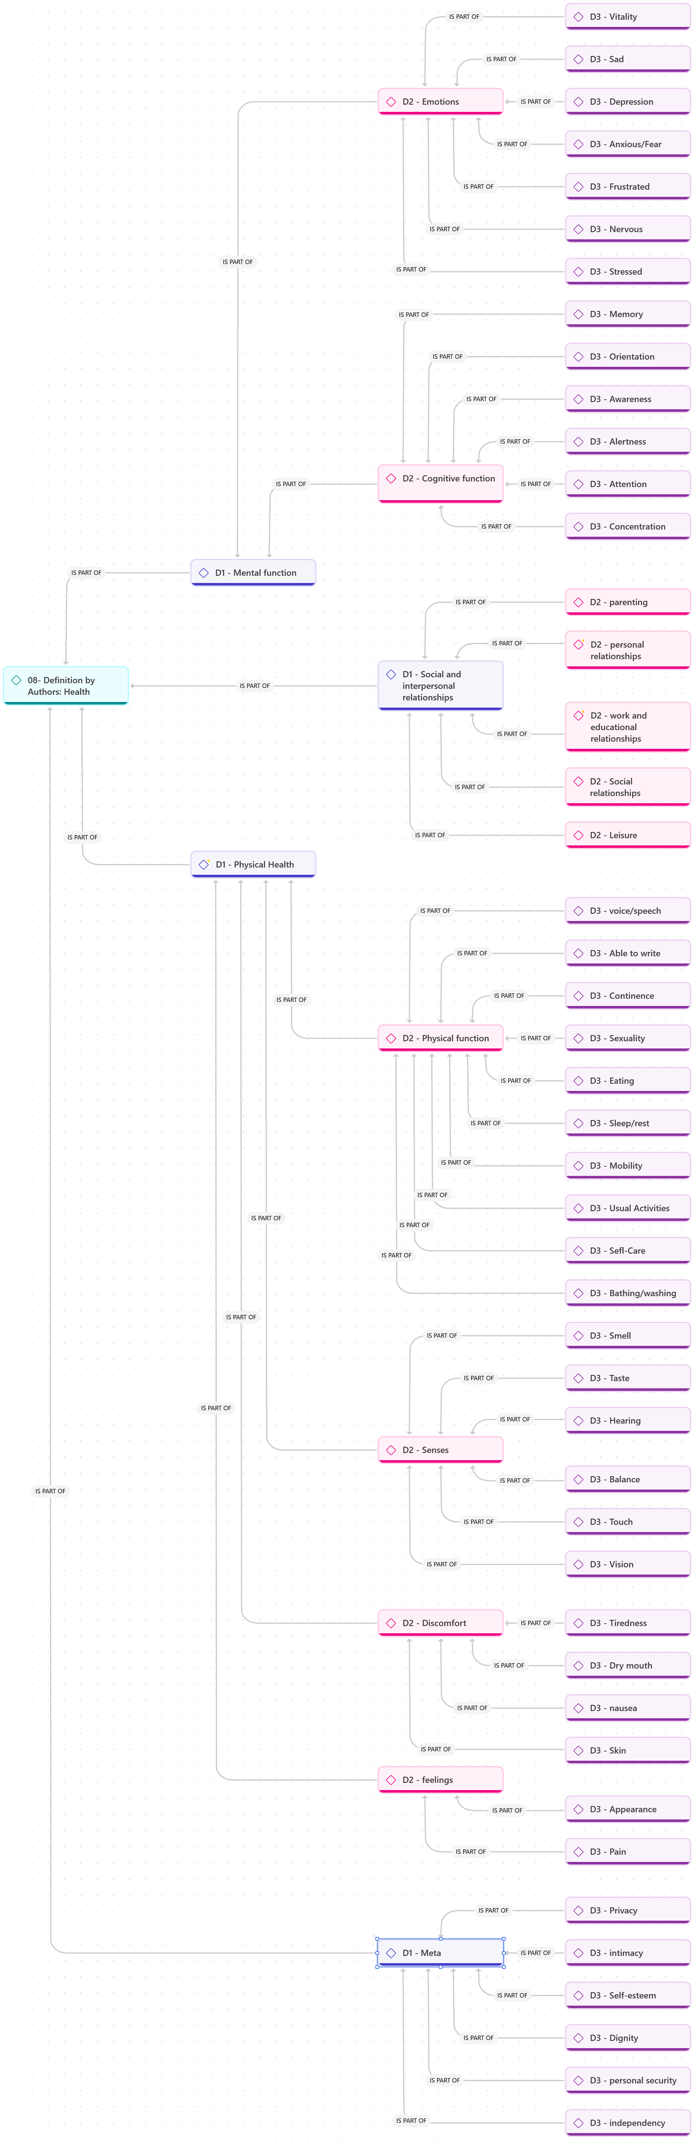

Supplement: Supplementary file 6 [file d110a9b9e88da1217cf69351.docx]
