# Supplementary material for: Conceptual Mapping of Health-Related Quality of Life, Quality of Life, and Wellbeing: A Systematic Review and Assessment of Commonly Used Patient-Reported Outcomes Measures
Source: Research Square preprint supplement (doi:10.21203/rs.3.rs-6976096/v1), 2025-07-07
Supplement: Supplementary file 1 [file 2f8ec64b8d3ecf071457b7fc.docx]

Supplementary material 8.

Mapping of a set of PROMs to our final conceptual models.

HRQoL conceptual model mapping to commonly used instruments.

|  | COOP- WONCA | SF-36 | EQ-5D | BOLT-ONS | EQ-5D + BOLT-ONS | SICKNESS IMPACT PROFILE | PROMIS-29 | HUI | EQ-HWB* | 15D |
| --- | --- | --- | --- | --- | --- | --- | --- | --- | --- | --- |
| Activity | ✓ | O | ✓ |  | ✓ | ✓ | ✓ |  | ✓ | ✓ |
| Usual activities | ✓ | O | ✓ |  | ✓ | ✓ | ✓ |  | ✓ | ✓ |
| Anxiety / Depression |  | ✓ | ✓ |  | ✓ |  | ✓ |  | ✓ | ✓ |
| Physical Functioning | O | ✓ | O |  | O | ✓ | ✓ | ✓ | ✓ | ✓ |
| Cognitive function |  |  |  | ✓ | ✓ | O |  | ✓ | ✓ | ✓ |
| Communication/speech |  |  |  |  |  | ✓ |  | ✓ | ✓ | ✓ |
| Mental functioning, feelings and emotions | ✓ | ✓ | O |  | O | ✓ | ✓ | ✓ | ✓ | ✓ |
| Hearing |  |  |  | ✓ | ✓ |  |  | ✓ | ✓ | ✓ |
| Mobility and physical capacity | O | ✓ | ✓ |  | ✓ | ✓ | ✓ | ✓ | ✓ | ✓ |
| Pain / Discomfort | ✓ | ✓ | ✓ |  | ✓ |  | ✓ | ✓ | ✓ | ✓ |
| Social and interpersonal relationships | O | O |  | ✓ | ✓ | ✓ | ✓ |  | ✓ |  |
| Self-esteem and self-acceptance |  |  |  | O | O |  |  |  | ✓ |  |
| Self-care |  | ✓ | ✓ |  | ✓ | ✓ |  | ✓ | ✓ |  |
| Vision |  |  |  | ✓ | ✓ |  |  | ✓ | ✓ | ✓ |
| Social acceptance |  |  |  |  |  | O | ✓ |  | ✓ |  |
| Sleep/Vitality/ Energy |  | ✓ |  | ✓ | ✓ | ✓ | ✓ |  | ✓ | ✓ |
| Sex |  |  |  |  |  |  |  |  |  | ✓ |
| Senses |  |  |  |  |  |  |  | ✓ | ✓ | ✓ |

*We used a ballot box with a bold check (✓) for those dimensions that were explicitly mentioned in the instrument, whereas an O was used when the dimensions were conceptually or semantically mentioned. When those two premises were not fulfilled, an empty space was left in the cell. *Though the* EQ-HWB *is not a commonly used instrument, it is a recent instrument in development that was considered relevant.*

QoL conceptual model mapping to commonly used instruments

|  | AQOL-8D | WHO-QOL |
| --- | --- | --- |
| Activity | ✓ | ✓ |
| Usual activities | ✓ | ✓ |
| Anxiety / Depression | ✓ |  |
| Physical Functioning | O | ✓ |
| Cognitive function | ✓ | ✓ |
| Communication/speech | ✓ | ✓ |
| Mental functioning, feelings and emotions | ✓ | ✓ |
| Hearing | ✓ |  |
| Mobility and physical capacity | ✓ | ✓ |
| Pain / Discomfort | ✓ | ✓ |
| Social and interpersonal relationships | ✓ | ✓ |
| Self-esteem and self-acceptance | O | ✓ |
| Self-care | ✓ |  |
| Vision | ✓ |  |
| Social acceptance | O | ✓ |
| Sleep/Vitality/ Energy | ✓ | ✓ |
| Sex | ✓ | ✓ |
| Senses | ✓ | ✓ |
| Level of independence | ✓ | ✓ |
| Finances |  | ✓ |
| Citizenship and social inclusion | O |  |
| People’s time-use |  |  |

*We used a ballot box with a bold check (✓) for those dimensions that were explicitly mentioned in the instrument, whereas a O was used when the dimensions were conceptually or semantically mentioned. When those two premises were not fulfilled, an empty space was left in the cell.*

Wellbeing conceptual model mapping to commonly used instruments

|  | ICECAP-A | QUALITY OF WELLBEING SCALE | ICECAP-O | IWB | EQ-HWB* |
| --- | --- | --- | --- | --- | --- |
| Coping, autonomy and control | ✓ | ✓ | ✓ |  | ✓ |
| Social and interpersonal relationships | O |  | O |  | ✓ |
| Finances |  |  |  |  |  |
| Feelings and emotions | ✓ | O | ✓ | ✓ | ✓ |
| Family |  |  |  |  |  |
| Purpose and meaning |  |  |  | ✓ |  |
| Spirituality/Religion/Personal Believes |  |  |  | ✓ |  |
| Self-esteem and self-acceptance |  |  |  |  | ✓ |
| Physical Functioning |  | ✓ |  |  | ✓ |
| Resilience |  |  |  |  |  |

*We used a ballot box with a bold check (✓) for those dimensions that were explicitly mentioned in the instrument, whereas a O was used when the dimensions were conceptually or semantically mentioned. When those two premises were not fulfilled, an empty space was left in the cell *Though the* EQ-HWB *is not a commonly used instrument, it is a recent instrument in development that was considered relevant.*
