# Supplementary material for: Conceptual Mapping of Health-Related Quality of Life, Quality of Life, and Wellbeing: A Systematic Review and Assessment of Commonly Used Patient-Reported Outcomes Measures
Source: Research Square preprint supplement (doi:10.21203/rs.3.rs-6976096/v1), 2025-07-07
Supplement: Supplementary file 2 [file 5059c6ad76dcc185f75fc845.docx]

# Supplementary material 2.

# Search strategies.

**Pubmed** 7/5/2023

| Search | Query | Results |
| --- | --- | --- |
| #43 | #9 AND #18 AND #41 Filters: from 2013/1/1 - 3000/12/12 | [11,269](https://pubmed.ncbi.nlm.nih.gov/?term=%239+AND+%2318+AND+%2341&filter=dates.2013%2F1%2F1-3000%2F12%2F12&ac=no&sort=relevance) |
| #42 | #9 AND #18 AND #41 | [16,813](https://pubmed.ncbi.nlm.nih.gov/?term=%239+AND+%2318+AND+%2341&ac=no&sort=relevance) |
| #41 | #19 OR #20 OR #21 OR #22 OR #23 OR #24 OR #25 OR #26 OR #27 OR #28 OR #29 OR #30 OR #31 OR #32 OR #33 OR #34 OR #35 OR #36 OR #37 OR #38 OR #39 OR #40 | [779,062](https://pubmed.ncbi.nlm.nih.gov/?term=%2319+OR+%2320+OR+%2321+OR+%2322+OR+%2323+OR+%2324+OR+%2325+OR+%2326+OR+%2327+OR+%2328+OR+%2329+OR+%2330+OR+%2331+OR+%2332+OR+%2333+OR+%2334+OR+%2335+OR+%2336+OR+%2337+OR+%2338+OR+%2339+OR+%2340&ac=no&sort=relevance) |
| #40 | Interviews as Topic[Mesh] | [66,817](https://pubmed.ncbi.nlm.nih.gov/?term=Interviews+as+Topic%5BMesh%5D&ac=no&sort=relevance) |
| #39 | Action Research[tiab] | [5,595](https://pubmed.ncbi.nlm.nih.gov/?term=Action+Research%5Btiab%5D&ac=no&sort=relevance) |
| #38 | Narrative Inquir*[tiab] | [590](https://pubmed.ncbi.nlm.nih.gov/?term=Narrative+Inquir%2A%5Btiab%5D&ac=no&sort=relevance) |
| #37 | Interview*[tiab] | [448,320](https://pubmed.ncbi.nlm.nih.gov/?term=Interview%2A%5Btiab%5D&ac=no&sort=relevance) |
| #36 | Purposive Sampl*[tiab] | [12,006](https://pubmed.ncbi.nlm.nih.gov/?term=Purposive+Sampl%2A%5Btiab%5D&ac=no&sort=relevance) |
| #35 | Theoretical Sampl*[tiab] | [906](https://pubmed.ncbi.nlm.nih.gov/?term=Theoretical+Sampl%2A%5Btiab%5D&ac=no&sort=relevance) |
| #34 | Focus Group*[tiab] | [62,877](https://pubmed.ncbi.nlm.nih.gov/?term=Focus+Group%2A%5Btiab%5D&ac=no&sort=relevance) |
| #33 | Focus Groups[Mesh] | [35,563](https://pubmed.ncbi.nlm.nih.gov/?term=Focus+Groups%5BMesh%5D&ac=no&sort=relevance) |
| #32 | Grounded Theor*[tiab] | [14,937](https://pubmed.ncbi.nlm.nih.gov/?term=Grounded+Theor%2A%5Btiab%5D&ac=no&sort=relevance) |
| #31 | Phenomenological Stud*[tiab] | [3,166](https://pubmed.ncbi.nlm.nih.gov/?term=Phenomenological+Stud%2A%5Btiab%5D&ac=no&sort=relevance) |
| #30 | Phenomenological Research[tiab] | [669](https://pubmed.ncbi.nlm.nih.gov/?term=Phenomenological+Research%5Btiab%5D&ac=no&sort=relevance) |
| #29 | Ethnographic Stud*[tiab] | [2,753](https://pubmed.ncbi.nlm.nih.gov/?term=Ethnographic+Stud%2A%5Btiab%5D&ac=no&sort=relevance) |
| #28 | Ethnographic Research[tiab] | [1,225](https://pubmed.ncbi.nlm.nih.gov/?term=Ethnographic+Research%5Btiab%5D&ac=no&sort=relevance) |
| #27 | Qualitative Review*[tiab] | [1,727](https://pubmed.ncbi.nlm.nih.gov/?term=Qualitative+Review%2A%5Btiab%5D&ac=no&sort=relevance) |
| #26 | Qualitative Stud*[tiab] | [67,365](https://pubmed.ncbi.nlm.nih.gov/?term=Qualitative+Stud%2A%5Btiab%5D&ac=no&sort=relevance) |
| #25 | Qualitative Research[tiab] | [33,708](https://pubmed.ncbi.nlm.nih.gov/?term=Qualitative+Research%5Btiab%5D&ac=no&sort=relevance) |
| #24 | Qualitative Research[Mesh] | [81,058](https://pubmed.ncbi.nlm.nih.gov/?term=Qualitative+Research%5BMesh%5D&ac=no&sort=relevance) |
| #23 | Mapping[tiab] | [211,323](https://pubmed.ncbi.nlm.nih.gov/?term=Mapping%5Btiab%5D&ac=no&sort=relevance) |
| #22 | Conceptual Attribute*[tiab] | [37](https://pubmed.ncbi.nlm.nih.gov/?term=Conceptual+Attribute%2A%5Btiab%5D&ac=no&sort=relevance) |
| #21 | Conceptual Frame*[tiab] | [17,455](https://pubmed.ncbi.nlm.nih.gov/?term=Conceptual+Frame%2A%5Btiab%5D&ac=no&sort=relevance) |
| #20 | Conceptual Map*[tiab] | [301](https://pubmed.ncbi.nlm.nih.gov/?term=Conceptual+Map%2A%5Btiab%5D&ac=no&sort=relevance) |
| #19 | Conceptual Model*[tiab] | [11,204](https://pubmed.ncbi.nlm.nih.gov/?term=Conceptual+Model%2A%5Btiab%5D&ac=no&sort=relevance) |
| #18 | #10 OR #11 OR #12 OR #13 OR #14 OR #15 OR #16 OR #17 | [3,021,609](https://pubmed.ncbi.nlm.nih.gov/?term=%2310+OR+%2311+OR+%2312+OR+%2313+OR+%2314+OR+%2315+OR+%2316+OR+%2317&ac=no&sort=relevance) |
| #17 | Definition[tiab] | [149,461](https://pubmed.ncbi.nlm.nih.gov/?term=Definition%5Btiab%5D&ac=no&sort=relevance) |
| #16 | Concept*[tiab] | [579,195](https://pubmed.ncbi.nlm.nih.gov/?term=Concept%2A%5Btiab%5D&ac=no&sort=relevance) |
| #15 | Terminology as Topic[Mesh] | [62,431](https://pubmed.ncbi.nlm.nih.gov/?term=Terminology+as+Topic%5BMesh%5D&ac=no&sort=relevance) |
| #14 | Validation*[tiab] | [300,739](https://pubmed.ncbi.nlm.nih.gov/?term=Validation%2A%5Btiab%5D&ac=no&sort=relevance) |
| #13 | Validit*[tiab] | [213,472](https://pubmed.ncbi.nlm.nih.gov/?term=Validit%2A%5Btiab%5D&ac=no&sort=relevance) |
| #12 | Construct*[tiab] | [680,740](https://pubmed.ncbi.nlm.nih.gov/?term=Construct%2A%5Btiab%5D&ac=no&sort=relevance) |
| #11 | Dimension*[tiab] | [706,186](https://pubmed.ncbi.nlm.nih.gov/?term=Dimension%2A%5Btiab%5D&ac=no&sort=relevance) |
| #10 | Domain*[tiab] | [721,800](https://pubmed.ncbi.nlm.nih.gov/?term=Domain%2A%5Btiab%5D&ac=no&sort=relevance) |
| #9 | #1 OR #2 OR #3 OR #4 OR #5 OR #6 OR #7 OR #8 | [541,517](https://pubmed.ncbi.nlm.nih.gov/?term=%231+OR+%232+OR+%233+OR+%234+OR+%235+OR+%236+OR+%237+OR+%238&ac=no&sort=relevance) |
| #8 | Well Being[tiab] | [110,541](https://pubmed.ncbi.nlm.nih.gov/?term=Well+Being%5Btiab%5D&ac=no&sort=relevance) |
| #7 | Wellbeing[tiab] | [130,722](https://pubmed.ncbi.nlm.nih.gov/?term=Wellbeing%5Btiab%5D&ac=no&sort=relevance) |
| #6 | HRQoL[tiab] | [23,405](https://pubmed.ncbi.nlm.nih.gov/?term=HRQoL%5Btiab%5D&ac=no&sort=relevance) |
| #5 | HRQL[tiab] | [4,073](https://pubmed.ncbi.nlm.nih.gov/?term=HRQL%5Btiab%5D&ac=no&sort=relevance) |
| #4 | QoL[tiab] | [51,812](https://pubmed.ncbi.nlm.nih.gov/?term=QoL%5Btiab%5D&ac=no&sort=relevance) |
| #3 | Life Quality[tiab] | [10,256](https://pubmed.ncbi.nlm.nih.gov/?term=Life+Quality%5Btiab%5D&ac=no&sort=relevance) |
| #2 | "Quality of Life"[tiab] | [359,847](https://pubmed.ncbi.nlm.nih.gov/?term=%22Quality+of+Life%22%5Btiab%5D&ac=no&sort=relevance) |
| #1 | Quality of Life[Mesh] | [264,609](https://pubmed.ncbi.nlm.nih.gov/?term=Quality+of+Life%5BMesh%5D&ac=no&sort=relevance) |

**EMBase** 7/5/2023

Embase Classic+Embase <1947 to 2023 May 05>

1 exp "quality of life"/ 643977

2 (Quality adj3 Life).ti,ab. 599946

3 QoL.ti,ab. 97359

4 HRQL.ti,ab. 7067

5 HRQoL.ti,ab. 36783

6 Wellbeing.ti,ab. 41871

7 (Well adj1 Being).ti,ab. 136865

8 or/1-7 926012

9 Domain*.ti,ab. 862215

10 Dimension*.ti,ab. 764953

11 Construct*.ti,ab. 810735

12 Validit*.ti,ab. 264714

13 Validation*.ti,ab. 425212

14 Concept*.ti,ab. 730557

15 Definition.ti,ab. 219493

16 or/9-15 3623300

17 (Conceptual adj1 Model*).ti,ab. 12767

18 (Conceptual adj1 Map*).ti,ab. 400

19 (Conceptual adj1 Frame*).ti,ab. 19835

20 (Conceptual adj1 Attribute*).ti,ab. 46

21 Mapping.ti,ab. 253269

22 exp qualitative research/ 115771

23 (Qualitative adj1 Research).ti,ab. 21892

24 (Qualitative adj1 Stud*).ti,ab,kw. 78916

25 (Qualitative adj1 Review*).ti,ab,kw. 2916

26 (Ethnographic adj1 Research).ti,ab. 1266

27 (Ethnographic adj1 Stud*).ti,ab. 3075

28 (Phenomenological adj1 Research).ti,ab. 725

29 (Phenomenological adj1 Stud*).ti,ab. 3550

30 (Grounded adj1 Theor*).ti,ab. 19183

31 (Focus adj1 Group*).ti,ab. 78952

32 (Theoretical adj1 Sampl*).ti,ab. 1110

33 (Purposive adj1 Sampl*).ti,ab. 17230

34 Interview*.ti,ab. 574730

35 (Narrative adj1 Inquir*).ti,ab. 583

36 (Action adj1 Research).ti,ab. 6574

37 exp interview/ 370760

38 or/17-37 1028620

39 8 and 16 and 38 24058

40 limit 39 to (embase and embase status and yr="2013 -Current") 7160

**SocINDEX** 7/5/2023

| **#** | **Query** | **Results** |
| --- | --- | --- |
| S41 | S9 AND S17 AND S40 Limiters - Date of Publication: 20130101-20230531 | 1,596 |
| S40 | S18 OR S19 OR S20 OR S21 OR S22 OR S23 OR S24 OR S25 OR S26 OR S27 OR S28 OR S29 OR S30 OR S31 OR S32 OR S33 OR S34 OR S35 OR S36 OR S37 OR S38 OR S39 | 185,158 |
| S39 | DE "INTERVIEWING" | 23,919 |
| S38 | TI (Action N1 Research) OR AB (Action N1 Research) | 3,790 |
| S37 | TI (Narrative N1 Inquir*) OR AB (Narrative N1 Inquir*) | 359 |
| S36 | TI Interview* OR AB Interview* | 128,730 |
| S35 | TI (Purposive N1 Sampl*) OR AB (Purposive N1 Sampl*) | 1,552 |
| S34 | TI (Theoretical N1 Sampl*) OR AB (Theoretical N1 Sampl*) | 189 |
| S33 | TI (Focus N1 Group*) OR AB (Focus N1 Group*) | 13,406 |
| S32 | DE "FOCUS groups" | 5,208 |
| S31 | TI (Grounded N1 Theor*) OR AB (Grounded N1 Theor*) | 4,707 |
| S30 | TI (Phenomenological N1 Stud*) OR AB (Phenomenological N1 Stud*) | 812 |
| S29 | TI (Phenomenological N1 Research) OR AB (Phenomenological N1 Research) | 218 |
| S28 | TI (Ethnographic N1 Stud*) OR AB (Ethnographic N1 Stud*) | 4,534 |
| S27 | TI (Ethnographic N1 Research) OR AB (Ethnographic N1 Research) | 3,988 |
| S26 | TI (Qualitative N1 Review*) OR AB (Qualitative N1 Review*) | 401 |
| S25 | TI (Qualitative N1 Stud*) OR AB (Qualitative N1 Stud*) | 14,985 |
| S24 | TI (Qualitative N1 Research) OR AB (Qualitative N1 Research) | 9,589 |
| S23 | DE "QUALITATIVE research" | 19,392 |
| S22 | TI Mapping OR AB Mapping | 6,594 |
| S21 | TI (Conceptual N1 Attribute*) OR AB (Conceptual N1 Attribute*) | 16 |
| S20 | TI (Conceptual N1 Frame*) OR AB (Conceptual N1 Frame*) | 6,976 |
| S19 | TI (Conceptual N1 Map*) OR AB (Conceptual N1 Map*) | 153 |
| S18 | TI (Conceptual N1 Model*) OR AB (Conceptual N1 Model*) | 2,776 |
| S17 | S10 OR S11 OR S12 OR S13 OR S14 OR S15 OR S16 | 388,173 |
| S16 | TI Definition* OR AB Definition* | 45,827 |
| S15 | TI Concept* OR AB Concept* | 188,455 |
| S14 | TI Validation* OR AB Validation* | 7,765 |
| S13 | TI Validit* OR AB Validit* | 26,377 |
| S12 | TI Construct* OR AB Construct* | 105,179 |
| S11 | TI Dimension* OR AB Dimension* | 60,682 |
| S10 | TI Domain* OR AB Domain* | 25,961 |
| S9 | S1 OR S2 OR S3 OR S4 OR S5 OR S6 OR S7 OR S8 | 57,413 |
| S8 | TI (Well N1 Being) OR AB (Well N1 Being) | 31,838 |
| S7 | TI Wellbeing OR AB Wellbeing | 6,506 |
| S6 | DE "WELL-being" | 12,031 |
| S5 | TI HRQoL OR AB HRQoL | 381 |
| S4 | TI HRQL OR AB HRQL | 91 |
| S3 | TI QoL OR AB QoL | 1,170 |
| S2 | TI (Quality N3 Life) OR AB (Quality N3 Life) | 15,317 |
| S1 | DE "QUALITY of life" | 13,512 |

**Scopus**

12,171 document results

**INDEXTERMS ( "Quality of Life" ) OR TITLE-ABS ( "Quality of Life" ) OR TITLE-ABS ( "Life Quality" ) OR TITLE-ABS ( qol ) OR TITLE-ABS ( hrql ) OR TITLE-ABS ( hrqol ) OR TITLE-ABS ( wellbeing ) OR TITLE-ABS ( "Well Being" ) ) AND ( TITLE-ABS ( domain* ) OR TITLE-ABS ( dimension* ) OR TITLE-ABS ( construct* ) OR TITLE-ABS ( validit* ) OR TITLE-ABS ( validation* ) OR INDEXTERMS ( "Terminology as Topic" ) OR TITLE-ABS ( concept* ) OR TITLE-ABS ( definition ) ) AND ( TITLE-ABS ( "Conceptual Model*" ) OR TITLE-ABS ( "Conceptual Map*" ) OR TITLE-ABS ( "Conceptual Frame*" ) OR TITLE-ABS ( "Conceptual Attribute*" ) OR TITLE-ABS ( mapping ) OR INDEXTERMS ( "Qualitative Research" ) OR TITLE-ABS ( "Qualitative Research" ) OR TITLE-ABS ( "Qualitative Stud*" ) OR TITLE-ABS ( "Qualitative Review*" ) OR TITLE-ABS ( "Ethnographic Research" ) OR TITLE-ABS ( "Ethnographic Stud*" ) OR TITLE-ABS ( "Phenomenological Research" ) OR TITLE-ABS ( "Phenomenological Stud*" ) OR TITLE-ABS ( "Grounded Theor*" ) OR INDEXTERMS ( "Focus Groups" ) OR TITLE-ABS ( "Focus Group*" ) OR TITLE-ABS ( "Theoretical Sampl*" ) OR TITLE-ABS ( "Purposive Sampl*" ) OR TITLE-ABS ( interview* ) OR TITLE-ABS ( "Narrative Inquir*" ) OR TITLE-ABS ( "Action Research" ) OR INDEXTERMS ( "Interviews as Topic" ) ) ) AND ( LIMIT-TO ( PUBYEAR , 2023 ) OR LIMIT-TO ( PUBYEAR , 2022 ) OR LIMIT-TO ( PUBYEAR , 2021 ) OR LIMIT-TO ( PUBYEAR , 2020 ) OR LIMIT-TO ( PUBYEAR , 2019 ) OR LIMIT-TO ( PUBYEAR , 2018 ) OR LIMIT-TO ( PUBYEAR , 2017 ) OR LIMIT-TO ( PUBYEAR , 2016 ) OR LIMIT-TO ( PUBYEAR , 2015 ) OR LIMIT-TO ( PUBYEAR , 2014 ) OR LIMIT-TO ( PUBYEAR , 2013 ) ) AND ( LIMIT-TO ( SUBJAREA , "MEDI" ) OR LIMIT-TO ( SUBJAREA , "SOCI" ) ) AND ( LIMIT-TO ( DOCTYPE , "ar" ) )**
