# Supplementary material for: Conceptual Mapping of Health-Related Quality of Life, Quality of Life, and Wellbeing: A Systematic Review and Assessment of Commonly Used Patient-Reported Outcomes Measures
Source: Research Square preprint supplement (doi:10.21203/rs.3.rs-6976096/v1), 2025-07-07
Supplement: Supplementary file 3 [file 5ac5333360911f2e7e163656.docx]

Supplementary Material 7.

High-level concept mapping.

These graphs provide a significant amount of information besides the most frequent domains found in the literature in each high-level concept: 1) The **size** of each domain node: each node size is proportional to the frequency of inclusion of each domain in each initial framework; 2) **Directionality**: each arrow has a direction that reflects the hierarchical relation among domains/concept established by any of initial high-level frameworks; and 3) Arrow **thickness**: it reflects the frequency of the depicted relationship among two domains/concept in the initial surveyed frameworks. It is worth clarifying that the distance between nodes has no specific reasoning.

Graphical representation of HRQoL possible candidate domains, based on the frequency of the domains in the original frameworks (at least present in one-third), their structural relationship and directionality.

Graphical representation of QoL possible candidate domains, based on the frequency of the domains in the original frameworks (at least present in one-third), their structural relationship and directionality

Graphical representation of Well-being (WB) possible candidate domains, based on the frequency of the domains in the original frameworks (at least present in one-third), their structural relationship and directionality.
