# Supplementary material for: Conceptual Mapping of Health-Related Quality of Life, Quality of Life, and Wellbeing: A Systematic Review and Assessment of Commonly Used Patient-Reported Outcomes Measures
Source: Research Square preprint supplement (doi:10.21203/rs.3.rs-6976096/v1), 2025-07-07
Supplement: Supplementary file 4 [file 87ef3dd6adaa65ca3cfe5fda.xlsx]

## Sheet: Domains
Supplementary Material 6 Table. Numbers of domains, and domains that are not kept (in red) according to their frequency.
For example, domains in red in the initial row are the ones that will dissapear if we have a rule of including those that are repeated in at least two frameworks, and so on.
Frequency of Repetitions	HRQoL	Wellbeing	Qol	HRQoL	WB	QoL
1	82	69	49	Anxiety / Depression; Awareness; Biological and Physiological Factors; Change in health; Citizenship and social inclusion; Cognitive function; Coping, autonomy and control; Emotional Stability; Engagement; Family; Feelings and emotions; Finances; Freedom; Functioning; Global Health; Hearing; Level of independence; Life Satisfaction; Lifestyle behaviors; Mental Health; Meta; Mind-frame; Mobility a…	Acceptance; Achievement; Anxiety / Depression; Attachment; Awareness; Citizenship and social inclusion; Cognitive function; Community unity; Competence; Conditions; Coping, autonomy and control; Cross-cutting; Emotional Stability; Empathy; Engagement; Enviroment; Eudaimonic; Family; Feeling cared for; Feelings and emotions; Finances; Freedom; Functioning; Global Health; Hedonic; Independent power…	Anxiety / Depression; Citizenship and social inclusion; Coping, autonomy and control; Emotional Stability; Enviroment; Family; Feelings and emotions; Finances; Freedom; Global Health; Hearing; Level of independence; Life Satisfaction; Mental Health; Mobility and physical capacity; Pain / Discomfort; People’s time-use; personal development; Physical Functioning; Psychological domain; Rights; Self-…
2	40	29	17	Anxiety / Depression; Biological and Physiological Factors; Citizenship and social inclusion; Cognitive function; Coping, autonomy and control; Emotional Stability; Family; Feelings and emotions; Finances; Freedom; Global Health; Hearing; Mental Health; Mobility and physical capacity; Pain / Discomfort; Peace, security, justice; People’s time-use; personal development; Physical Functioning; Physi…	Achievement; Cognitive function; Competence; Coping, autonomy and control; Emotional Stability; Engagement; Enviroment; Eudaimonic; Family; Feelings and emotions; Finances; Freedom; Global Health; Hedonic; Life Satisfaction; Peace, security, justice; People’s time-use; personal development; Physical Functioning; Resilience; Self-esteem and self-acceptance; Social and interpersonal relationships; …	Citizenship and social inclusion; Emotional Stability; Feelings and emotions; Finances; Level of independence; Mobility and physical capacity; Pain / Discomfort; People’s time-use; Physical Functioning; Self-esteem and self-acceptance; Sleep; Social and interpersonal relationships; Usual activities; Communication/speech; personal relationships; Sex; Vitality/ Energy
3	29	21	11	Anxiety / Depression; Biological and Physiological Factors; Citizenship and social inclusion; Cognitive function; Feelings and emotions; Freedom; Global Health; Hearing; Mental Health; Mobility and physical capacity; Pain / Discomfort; personal development; Physical Functioning; Self-care; Self-esteem and self-acceptance; Sleep; Social and interpersonal relationships; Usual activities; Vision; Co…	Competence; Coping, autonomy and control; Emotional Stability; Family; Feelings and emotions; Finances; Global Health; Life Satisfaction; Peace, security, justice; People’s time-use; personal development; Physical Functioning; Resilience; Self-esteem and self-acceptance; Social and interpersonal relationships; Spirituality/Religion/Personal Beliefs; Usual activities; Worklife; Life attitude; pers…	Feelings and emotions; Finances; Mobility and physical capacity; Pain / Discomfort; Physical Functioning; Self-esteem and self-acceptance; Sleep; Social and interpersonal relationships; Usual activities; Sex; Vitality/ Energy
4	21	10	3	Anxiety / Depression; Biological and Physiological Factors; Cognitive function; Feelings and emotions; Global Health; Hearing; Mental Health; Mobility and physical capacity; Pain / Discomfort; Physical Functioning; Self-care; Self-esteem and self-acceptance; Sleep; Social and interpersonal relationships; Usual activities; Vision; Communication/speech; Physical condition; Social acceptance; Thinki…	Coping, autonomy and control; Family; Feelings and emotions; Finances; Physical Functioning; Resilience; Self-esteem and self-acceptance; Social and interpersonal relationships; Spirituality/Religion/Personal Beliefs; Purpose and meaning	Finances; Social and interpersonal relationships; Usual activities
5	18	8	0	Anxiety / Depression; Biological and Physiological Factors; Cognitive function; Feelings and emotions; Hearing; Mental Health; Mobility and physical capacity; Pain / Discomfort; Physical Functioning; Self-care; Self-esteem and self-acceptance; Sleep; Social and interpersonal relationships; Usual activities; Vision; Communication/speech; Social acceptance; Vitality/ Energy	Coping, autonomy and control; Family; Feelings and emotions; Finances; Physical Functioning; Self-esteem and self-acceptance; Social and interpersonal relationships; Purpose and meaning
6	17	4	0	Anxiety / Depression; Biological and Physiological Factors; Cognitive function; Feelings and emotions; Hearing; Mental Health; Mobility and physical capacity; Pain / Discomfort; Physical Functioning; Self-care; Self-esteem and self-acceptance; Sleep; Social and interpersonal relationships; Usual activities; Vision; Communication/speech; Vitality/ Energy	Feelings and emotions; Self-esteem and self-acceptance; Social and interpersonal relationships; Purpose and meaning
7	14	3	0	Anxiety / Depression; Feelings and emotions; Hearing; Mental Health; Mobility and physical capacity; Pain / Discomfort; Physical Functioning; Self-care; Sleep; Social and interpersonal relationships; Usual activities; Vision; Communication/speech; Vitality/ Energy	Feelings and emotions; Self-esteem and self-acceptance; Social and interpersonal relationships
8	12	2	0	Anxiety / Depression; Feelings and emotions; Hearing; Mobility and physical capacity; Pain / Discomfort; Physical Functioning; Self-care; Sleep; Social and interpersonal relationships; Usual activities; Vision; Vitality/ Energy	Feelings and emotions; Self-esteem and self-acceptance
9	6	0	0	Mobility and physical capacity; Pain / Discomfort; Physical Functioning; Social and interpersonal relationships; Usual activities; Vitality/ Energy
10	3	0	0	Pain / Discomfort; Social and interpersonal relationships; Vitality/ Energy
11	1	0	0	Pain / Discomfort
12	1	0	0	Pain / Discomfort
