# Supplementary material for: Conceptual Mapping of Health-Related Quality of Life, Quality of Life, and Wellbeing: A Systematic Review and Assessment of Commonly Used Patient-Reported Outcomes Measures
Source: Research Square preprint supplement (doi:10.21203/rs.3.rs-6976096/v1), 2025-07-07
Supplement: Supplementary file 7 [file d500541c5c1e87a486023233.docx]

Studies from databases/registers **(n = 14115)**

References from other sources **(n = 1)**

Citation searching (n = 0)

Grey literature (n = 0)

**Identification**

Included studies ongoing **(n = 0)**

Studies awaiting classification **(n = 0)**

Studies included in review **(n = 35)**

**(36 total conceptual frameworks)**

Studies excluded **(n = 13883)**

Studies not retrieved **(n = 0)**

Studies assessed for eligibility **(n = 54)**

Studies sought for retrieval **(n = 54)**

Studies screened **(n = 13937)**

Studies excluded **(n = 19)**

Others (n = 1)

Wrong outcomes (n = 1)

wrong objective (n = 11)

Wrong study design (n = 2)

Wrong patient population (n = 4)

References removed **(n = 176)**

Duplicates identified manually (n = 1)

Duplicates identified by Covidence (n = 175)

Marked as ineligible by automation tools (n = 0)

Other reasons (n = 0)

**Screening**

**Included**
