# Supplementary material for: Conceptual Mapping of Health-Related Quality of Life, Quality of Life, and Wellbeing: A Systematic Review and Assessment of Commonly Used Patient-Reported Outcomes Measures
Source: Research Square preprint supplement (doi:10.21203/rs.3.rs-6976096/v1), 2025-07-07
Supplement: Supplementary file 8 [file dc5d6afc59e5f2bb82d0c29c.xlsx]

## Sheet: Hoja 1
Supplementary Material Table. Initial Exhaustive List of Dimensions and Hierarchical Structures (HRQoL, QoL, WB)
In the first column we show the unique domains, subdomains, or facet concepts. In subsequent columns we show domains, subdomains, or facet concepts that were mapped to unique domains, subdomains, or facet concepts. D1, D2, D3 denote the original hierarchy of the domains, subdomains, or facet concepts in its original high-level conceptual framework.
Unified unique dimensions and their name
D1 - Enviroment	D1 - Forest and enviroment	D3 - Access to Nature	D3 - Environmental Quality	D2 - Intangible Connections to Nature	D2 - Tangible Connections to Nature	D2 - Physical environment (pollution/noise/traffic/climate)	D2 - Environment	D3 - Beauty & Inspiration	D3 - Infrastructure	D3 - Resource Abundance & Distribution	D3 - Resource Access & Tenure	D3 - Sense of Place	D3 - Stewardship
D1 - Freedom	D2 - Freedom & Voice	D2 - Freedom and self-determination	D2 - Freedom, physical safety and security	D2 - Personal freedom	D3 - Physical Safety	D3 - Sovereignty	D3 - personal security
D1 - Independent power and authority
D1 - Rights
D1 - Peace, security, justice	D2 - Security	D2 - Vulnerable/safe	D2 - Safety	D1 - Secure	D2 - Peace	D3 - Peace & Security	D2 - Equity & Justice	D3 - Disaster Preparedness
D2 - Transport
D2 - Health care center	D2 - Health and social care: accesibility and quality
D2 - Holidays
D2 - Opportunities for acquiring new information and skills
D1 - Acceptance
D1 - Achievement	D1 - Ability to pursue self-defined goals
D1 - Anxiety / Depression	D2 - Anxiety	D2 - Anxiety/distress	D2 - Depression	D2 - Depression/sadness	D2 - Emotional distress	D2 - Psychological suffering and stress	D2 - Stress	D2 - Suicidal ideations	D1 - Depression	D1 - Distress	D3 - Depression	D3 - Sad	D3 - Stressed
D1 - Mental Health	D1 - Mental function
D1 - Attachment
D1 - Awareness	D1 - Insight	D3 - Awareness
D1 - Mind-frame	D1 - Certain types of personality
D1 - Cognitive function	D1 - Cognition, sense and language	D1 - Cognitive evaluation	D1 - Cognition	D1 - Clear Thinking	D2 - Cognitive function	D2 - Ability to response swiftly
D2 - Communication/speech	D2 - Communication	D2 - Speech	D1 - Communication	D1 - Speech
D1 - Emotional Stability	D1 - Role-emotional	D1 - Emotional Wellbeing	D3 - Emotional & Mental Health	D1 - People’s experiential subjective wellbeing	D1 - emotional well-being	D1 - Emotion
D1 - Empathy
D1 - Engagement	D2 - Engagement	D2 - Engagement with life
D1 - Eudaimonic	D1 - Eudaimonic well-being
D1 - Feeling cared for
D1 - Hedonic	D1 - Hedonic Well-Being
D1 - Psychological domain
D1 - Positive appraisal
D1 - Positive characteristics
D1 - Self-esteem and self-acceptance	D1 - Self-efficacy/self-esteem	D1 - Self-Acceptance	D1 - Self-esteem	D2 - Self acceptance	D2 - Self-acceptance and self-respect	D2 - Self-esteem	D2 - Self-worth / self-respect	D2 - Feeling worthless	D1 - self-determination	D2 - Self harm	D2 - Level of confidence	D2 - selfconfidence	D3 - Self-Determination	D1 - Sense of Self	D1 - People’s subjective selves	D1 - Self identity	D1 - Self Worth	D3 - Self-esteem
D2 - Purpose and meaning	D1 - Meaning	D2 - Meaning	D1 - Sense of meaning and purpose	D2 - Purpose in life	D2 - Purpose in life
D2 - Introspection and self-knowledge
D2 - Ability to make decisions
D1 - Thoughts and Feelings about the Future
D2 - Breadth of mind
D1 - personal development	D2 - Sense of grouth	D2 - sense of satisfaction with life	D2 - Sense of accomplishment and purpose	D1 - Personal growth	D2 - Personal growth	D2 - Competence	D2 - Sense of growth
D2 - Ability to trust/respect
D2 - Burden to others	D2 - Feeling a burden
D1 - Feelings and emotions	D2 - Contentment	D2 - Sadness (depressed) - Happiness	D1 - Mood	D2 - Anger	D2 - Anger/frustration	D2 - Fear	D2 - Worry	D2 - Worry (anxiety) - Calm	D2 - Enthusiasm	D2 - Enthusiasm/pleasure	D2 - Pleasure	D2 - Positive affect	D2 - Negative feelings	D2 - Positive Feelings	D2 - Negative affect	D2 - Positive emotion	D1 - Positive affect	D1 - Positive affect/happiness	D1 - Overall positive state of emotions	D1 - Positive emotions	D1 - Happiness	D1 - Negative affect	D1 - Negative affect/feeling lost and lonely	D2 - Happiness	D1 - Emotional experiences	D1 - Experience of Emotions	D1 - Feeling	D2 - Emotional reactions	D2 - Emotional stability	D2 - Emotions	D2 - Despair	D2 - Agitation	D2 - Guilt/shame	D2 - Positive affect	D2 - feelings	D3 - Anxious/Fear	D3 - Feelings	D3 - Frustrated	D3 - Nervous
D2 - Life attitude	D2 - Optimism	D1 - Optimism	D2 - Mindset	D2 - Hopeless/hope
D1 - Lifestyle behaviors
D1 - Life Satisfaction	D1 - Enjoyment	D2 - Life satisfaction	D2 - Happiness/wellbeing/life satisfaction
D2 - Thinking, learning, memory and concentration	D2 - Memory	D2 - Active mind	D2 - Ability to remember	D2 - Ability to concentrate	D2 - Concentration	D2 - Ability to think	D2 - Confusion	D1 - Clear Thinking	D2 - Thinking clearly and Decision making	D3 - Attention	D3 - Concentration	D3 - Memory
D1 - Finances	D1 - Economic security	D2 - Financial security	D2 - Financial stress	D2 - Economy	D2 - Financial resources	D2 - Access to resources	D1 - Wellbeing	D2 - Paid employment	D1 - Material well-being	D3 - Employment & Income	D3 - Material Wealth & Security	D1 - Having enough for sustaining living	D1 - Material Wellbeing	D3 - Industry & Commerce	D3 - Local & Informal Economies
D1 - Conditions
D1 - Usual activities	D1 - Activity	D1 - Daily activities and work	D1 - Main activity	D1 - Daily activities	D2 - Activities of daily living	D2 - Effect of the usual activities	D2 - Livelihood & Activities	D2 - Usual/ Daily activities	D1 - Areas of daily life most often affected by health	D1 - Development and Activity	D1 - Successful fulfillment of obligations	D3 - Time for Fulfilling Activities	D2 - Regularity in daily life	D2 - Household tasks	D2 - Housing	D2 - Jobs around the house	D3 - Subsistence	D1 - Daily activities	D3 - Daily activities	D3 - Usual Activities
D1 - Mobility and physical capacity	D1 - Mobility	D2 - mobility	D2 - Physical mobility	D2 - Walking	D1 - Ambulation	D1- Ambulation	D3 - Mobility
D1 - Physical Functioning	D2 - Physical function	D1 - Body functioning	D1 - Physical Health	D1 - Physical independence	D1 - Physical well-being	D1 - Role-physical	D2 - Physical activity	D3 - Physical Health	D1 - Physical Wellbeing
D2 - Senses	D2 - Sensory functions
D1 - Physical sensations	D1 - Physical senses
D1 - Vision	D2 - Seeing	D2 - Vision	D3 - Vision
D1 - Hearing	D2 - Hearing	D3 - Hearing
D1 - Biological and Physiological Factors	D2 - Bowel movement	D2 - Breathing	D2 - Excretion	D2 - Bladder control	D2 - Appetite	D2 - Eating	D2 - Eating and digestion	D1 - Elimination	D1 - Breathing	D1 - eating	D3 - Continence	D3 - Eating
D2 - Physical condition	D2 - Body weight	D2 - Body weight	D2 - Physical fitness	D2 - Body strength	D1 - Physical fitness	D2 - Dexterity/ handling	D1 - Dexterity	D3 - Physical fitness
D2 - Colour of face	D2 - Body image and appearence	D2 - Physical appearance	D3 - Appearance
D1 - Change in health
D1 - Competence	D1 - Capabilities	D1 - Personal capabilities and attributes
D1 - Coping, autonomy and control	D1 - Coping	D1 - Autonomy	D2 - Autonomy	D2 - Autonomy/control/dependence	D2 - Coping	D2 - Adaptation/coping	D2 - Control	D2 - Control/Choice	D1 - Sense of agency	D3 - Autonomy
D1 - Functioning	D1 - Function levels
D1 - Global Health	D1 - General Health Perceptions	D1 - Health	D1 - Personal Health	D1 - Problems with health	D1 - Overall health	D2 - Health
D1 - Level of independence	D1 - Independent Living	D3 - independency
D1 - Pain / Discomfort	D1 - Pain	D1 - Pain and physical discomfort	D2 - Degree of pain	D2 - Discomfort	D2 - Discomfort and pain	D2 - Frecuency of pain	D2 - Pain	D2 - Physical discomfort/pain	D2 - Pain and Disconfort	D3 - Pain
D1 - Positive functioning
D1 - Resilience	D2 - Resilience
D1 - Self-care	D2 - Self-care	D3 - Bathing/washing	D3 - Sefl-Care
D2 - Vitality/ Energy	D2 - Energy	D2 - Energy and fatigue	D2 - Fatigue	D2 - tiredness	D2 - Vitality	D1 - Vitality	D3 - Tiredness	D3 - Vitality
D1 - Sleep	D2 - Sleep	D2 - Sleep and rest	D2 - Sleep disturbance and sleep-related impairment	D2 - Sleep problems	D1 - Sleep and energy	D3 - Sleep/rest
D1 - Symptoms	D1 - Symptom/Problem Complexes	D1 - Discomfort/symptoms
D2 - Healing and resistance to illness
D2 - Sex	D2 - Sex life	D2 - Sexual activity	D2 - Intimate	D1 - Sexual activity	D3 - intimacy	D3 - Sexuality
D2 - Competence
D2 - Dependence on medication	D2 - Dependece on medical substances and medical aid
D2 - Dependence on non-medical substances (alcohol,tobacco, drugs...)
D1 - Intrapersonal aspects
D1 - Objective circumstances of people’s lives
D1 - Overall Quality of Life
D1 - Stability
D2 - Activities as provider/supporter
D2 - Diet habits	D3 - Food
D1 - People’s time-use	D2 - Leisure	D2 - Hobbies and interests	D1 - Leisure activities, or time to enjoy living	D2 - Participation in and opportunities for recreation/leisure activities	D3 - Recreation & Tourism
D2 - Enjoyable or meaningful activity/roles
D2 - Sustainability
D2 - Health knowledge
D2 - Knowledge & Technology	D3 - Education & Information	D3 - Research & Technology
D2 - Morality
D1 - Spirituality/Religion/Personal Beliefs	D1 - Spirituality and Religiosity	D1 - Participation in cultural/religious practices	D3 - Spirituality
D1 - Citizenship and social inclusion	D1 - social inclusion	D2 - Social isolation	D2 - Belonging / connectedness	D3 - Political Participation
D1 - Community unity
D1 - Family	D1 - Love/support in the family	D2 - family	D3 - Family & Community	D2 - parenting
D2 - personal relationships	D2 - Friends and acquaintances	D2 - Maintaining relationships	D1 - Friendship/support outside the family	D1 - Prosocial Behavior
D1 - Social activities	D1 - Social activities and leisure	D3 - Social activities	D2 - Social activities	D2 - Social activity
D1 - Social and interpersonal relationships	D1 - Relationships	D1 - interpersonal relations	D1 - IntERrpersonal aspects	D1 - Connections	D1 - Social Health	D1 - Social relationships	D1 - Positive relationships	D1 - Trascendence connected to something beyond oneself	D2 - Close rels	D2 - Enjoy close rels	D2 - Interpersonal/social relationships	D2 - Social relationships	D2 - Positive relationships	D2 - Positive relationships and Friendship	D2 - Social life	D1 - Interpersonal aspects	D1 - Intrapersonal aspects	D1 - Social functioning	D3 - Civil Society	D3 - Social Diversity & Integrity
D1 - Social wellbeing
D1 - Worklife	D2 - Work Capacity	D2 - Work satisfaction	D3 - Job Quality	D2 - work and educational relationships
D2 - Support	D2 - Practical social support	D2 - social support
D2 - Social acceptance	D2 - Feeling excluded	D2 - Feeling isolated	D2 - Loneliness	D2 - Loneliness/isolation	D2 - Stigma	D2 - Treated with dignity/respect	D2 - Being accepted and understood/being meaningful/being respected	D2 - Integration into the community	D2 - Being accepted and understood/being meaningful/being respected	D2 - Social integration	D2 - Social contact	D2 - Social inclusion/connectedness	D3 - Dignity
D2 - Family medical history
D2 - Culture & Identity	D3 - Cultural Values & Practices	D3 - Heritage	D3 - Identity
D2 - Adaptability to social environment
D2 - Adaptability to weather changes
D2 - Community Role	D2 - Citizen role	D2 - Social role	D2 - Social contribution	D2 - Social function
D2 - Governance & Management	D3 - General Governance	D3 - Pollution & Waste	D3 - Resource Management
D2 - Home enviroment	D3 - Public Services
D2 - Environmental mastery
D2 - Social coherence
D2 - Social actualization
D2 - Social engagement
D3 - Taste
D1 - Objective circumstances of people’s lives
D1 - Cross-cutting
D2 - Ability to response swiftly
D3 - Touch
